# Supplementary material for: TBHP mediated oxidation of N-2-alkynylphenyl α-amino carbonyl compounds to oxalic amides using visible light photoredox catalysis and their application in the synthesis of 2-aryl indoles
Source: Royal Society of Chemistry journal article supplement (doi:10.1039/c4ra17232a), 2015-01-01

**TBHP mediated oxidation of *N*-2-alkynylphenyl  
 $\alpha$ -amino carbonyl compounds to oxalic amides using  
visible light photoredox catalysis and its application  
in synthesis of 2-aryl indoles**

Wei Liu,<sup>†a</sup> Sheng Liu,<sup>†a</sup> Hongqi Xie,<sup>ab</sup> Zhixing Qing,<sup>a</sup> Jianguo

Zeng<sup>ab</sup> and Pi Cheng<sup>\*ab</sup>

<sup>a</sup> Co-Innovation Center of Hunan Province for Utilization of Functional Ingredients from Botanicals, Hunan Agricultural University, Changsha, Hunan 410128, China.

<sup>b</sup> Pre-State Key Laboratory for Germplasm Innovation and Utilization of Crop, Hunan Agricultural University, Changsha, Hunan 410128, China.

\* Corresponding author: Dr. Pi Cheng, E-mail: picheng55@126.com; Fax: +86 (731) 84686560

# Table of contents

|                                                                   |    |
|-------------------------------------------------------------------|----|
| General.....                                                      | 3  |
| Experimental procedure for synthesis of compounds <b>2</b> .....  | 3  |
| HPLC-Q-TOF analysis for intermediates <b>10</b> .....             | 3  |
| Characteristic data of targets compounds <b>2</b> .....           | 4  |
| Experimental procedure for synthesis of compounds <b>12</b> ..... | 10 |
| Characteristic data of targets compounds <b>12</b> .....          | 10 |
| Single crystal data of compound <b>2q</b> .....                   | 12 |
| NMR spectra of compounds <b>2</b> .....                           | 21 |
| NMR spectra of compounds <b>12</b> .....                          | 39 |

### General:

Column chromatography silica gel (200-300 mesh) and TCL plate were purchased from Qingdao Meijin Chemical Inc(Qingdao; China); HRMS data were obtained in the ESI mode on a Agilent 6530 Q-TOF/MS system;  $^1\text{H}$  NMR and  $^{13}\text{C}$  NMR spectra were recorded on Bruker 400 MHz spectrometer and chemical shifts were given in  $\delta$  with TMS as an internal reference.

### Representative experimental procedure for visible light promoted oxidation of *N*-2-alkynyl glycine esters (1) to *N*-2-alkynylphenyl oxalic amides (2):

A solution of *N*-2-alkynyl glycine ester **1** (1.0 mmol), 4.0 eq of TBHP (6M in decane), CuBr (20mol%), and Ru(bpy)<sub>3</sub>Cl<sub>2</sub>·6H<sub>2</sub>O (2mol%) in the super dried mixed solvent of MeCN/DMSO (4 mL,  $V_{\text{MeCN}}:V_{\text{DMSO}}=4:1$ ) was irradiated with 26W compact fluorescent lamp for 24 h at room temperature. After the reaction was completed, the resulting mixture was washed with water (5 mL×3). The organic layers were washed with brine and dried over MgSO<sub>4</sub>. The solvent were removed via vacuo and theresidue was purified by flash column chromatography (SiO<sub>2</sub>) with hexane/acetone (40:1) to give target compounds **2**.

### HPLC-Q-TOF analysis for intermediate 10

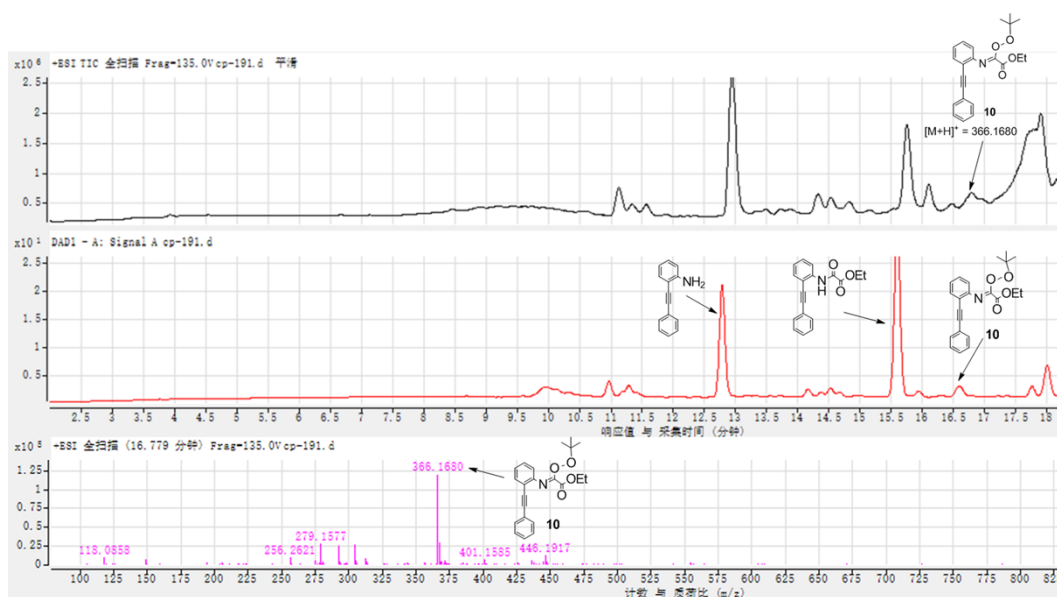

**Figure 1s.** HPLC-Q-TOF analysis of the photocatalytic reaction (sample from Table 1, entry 4)

**Characterization data of compounds 2**

**ethyl 2-oxo-2-((2-(phenylethynyl)phenyl)amino)acetate (2a):**

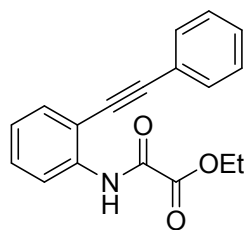

obtained as yellow solid, isolated yield 57%; mp: 84.5-86.0°C;  $^1\text{H NMR}$  (400MHz,  $\text{CDCl}_3$ ):  $\delta$  9.95 (s, 1H), 8.49 (brd,  $J = 8.0$  Hz, 1H), 7.66-7.64 (m, 2H), 7.54 (dd,  $J = 7.6, 1.2$  Hz, 1H), 7.41-7.37 (m, 4H), 7.15 (td,  $J = 8.4, 1.2$  Hz, 1H), 4.44 (q,  $J = 7.2$  Hz, 2H), 1.42 (t,  $J = 7.2$  Hz, 3H);  $^{13}\text{C NMR}$  (100MHz,  $\text{CDCl}_3$ ): 160.8, 153.9, 137.5, 131.7, 131.6, 131.6 (overlapped), 129.8, 129.1, 128.7, 128.7 (overlapped), 124.8, 122.3, 119.2, 113.2, 97.8, 83.7, 63.7, 14.1; HRMS (ESI-QTOF)  $m/z$ :  $[\text{M}+\text{H}]^+$  calcd for  $\text{C}_{18}\text{H}_{16}\text{NO}_3$  294.1125; found 294.1117.

**ethyl 2-oxo-2-((2-(p-tolyethynyl)phenyl)amino)acetate (2b):**

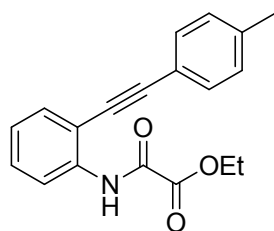

obtained as yellow solid, isolated yield 52%; mp: 104.0-106.0 °C;  $^1\text{H NMR}$  (400MHz,  $\text{CDCl}_3$ ):  $\delta$  9.95 (s, 1H), 8.48 (d,  $J = 8$  Hz, 1H), 7.53 (d,  $J = 8.0$  Hz, 2H), 7.51 (d,  $J = 1.6$  Hz, 1H), 7.38 (brt,  $J = 8.8$  Hz, 1H), 7.20 (d,  $J = 8.0$  Hz, 2H), 7.14 (td,  $J = 7.6, 0.8$  Hz, 1H), 4.44 (q,  $J = 7.2$  Hz, 2H), 2.39 (s, 3H), 1.42 (t,  $J = 7.2$  Hz, 3H);  $^{13}\text{C NMR}$  (100MHz,  $\text{CDCl}_3$ ): 160.8, 153.9, 139.4, 137.4, 131.6, 131.6 (overlapped), 131.5, 129.6, 129.6 (overlapped), 129.5, 124.8, 119.3, 119.2, 113.5, 98.0, 83.1, 63.8, 21.7, 14.1; HRMS (ESI-QTOF)  $m/z$ :  $[\text{M}+\text{H}]^+$  calcd for  $\text{C}_{19}\text{H}_{18}\text{NO}_3$  308.1281; found 308.1289.

**ethyl 2-((2-((4-ethylphenyl)ethynyl)phenyl)amino)-2-oxoacetate (2c)**

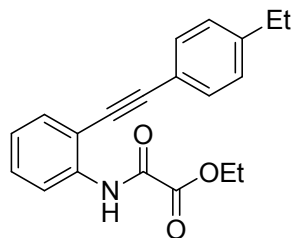

obtained as yellow viscous oil, isolated yield 49%;  $^1\text{H NMR}$  (400MHz,  $\text{CDCl}_3$ ):  $\delta$  9.95 (s, 1H), 8.49 (d,  $J = 8.4$  Hz, 1H), 7.56 (d,  $J = 8.0$  Hz, 2H), 7.52 (d,  $J = 7.6$  Hz, 1H), 7.38 (t,  $J = 7.6$  Hz, 1H), 7.23 (d,  $J = 8.0$  Hz, 2H), 7.15 (t,  $J = 7.6$  Hz, 1H), 4.44 (q,  $J = 7.2$  Hz, 2H), 2.68 (t,  $J = 7.6$  Hz, 2H), 1.42 (t,  $J = 7.2$  Hz, 3H), 1.26 (t,  $J = 7.6$  Hz, 3H);  $^{13}\text{C NMR}$  (100MHz,  $\text{CDCl}_3$ ):  $\delta$  160.7, 153.8, 145.5, 137.3, 131.6, 131.6

(overlapped), 131.4, 129.5, 128.1, 128.1(overlapped), 124.7, 119.3, 119.1, 113.4, 97.9, 83.0, 63.7, 28.9, 15.3, 14.0; HRMS (ESI-QTOF)  $m/z$ :  $[M+H]^+$  calcd for  $C_{20}H_{20}NO_3$  322.1438; found 322.1446.

**ethyl 2-((2-((4-methoxyphenyl)ethynyl)phenyl)amino)-2-oxoacetate (2d)**

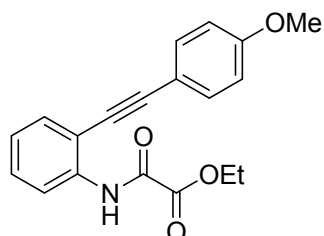

obtained as gray solid, isolated yield 46%; mp: 89.5-91.0°C;  $^1H$ NMR (400MHz,  $CDCl_3$ ):  $\delta$  9.95 (s, 1H), 8.47 (d,  $J = 8.0$  Hz, 1H), 7.58 (d,  $J = 8.8$  Hz, 2H), 7.50 (dd,  $J = 7.6$ , 1.2 Hz, 1H), 7.37 (brt,  $J = 8.4$  Hz, 1H) 7.14 (brt,  $J = 7.6$  Hz, 1H), 6.92 (d,  $J = 8.8$  Hz, 2H);  $^{13}C$  NMR (100MHz,  $CDCl_3$ ):  $\delta$  160.9, 160.3, 153.9, 137.3, 133.3, 133.3 (overlapped), 131.4, 129.4, 124.8, 119.2, 114.4, 114.4, 114.4 (overlapped), 113.7, 97.9, 82.5, 63.8, 55.5, 14.2; HRMS (ESI-QTOF)  $m/z$ :  $[M+H]^+$  calcd for  $C_{19}H_{18}NO_4$  324.1230; found 324.1237.

**ethyl 2-((2-((4-fluorophenyl)ethynyl)phenyl)amino)-2-oxoacetate (2e)**

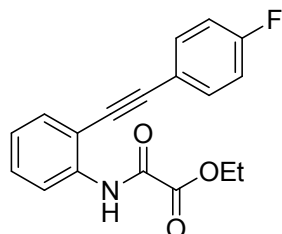

obtained as gray solid, isolated yield 50 %; mp: 118.0-120.0°C;  $^1H$ NMR (400MHz,  $CDCl_3$ ):  $\delta$  9.92 (s, 1H), 8.48 (d,  $J = 8.4$  Hz, 2H), 7.63 (d,  $J = 8.8$  Hz, 1H), 7.62 (d,  $J = 8.8$  Hz, 1H), 7.51 (dd,  $J = 7.6$ , 1.2 Hz, 1H), 7.39 (dt,  $J = 1.6$ , 8.8 Hz, 1H), 7.15 (td,  $J = 1.2$ , 7.6 Hz, 1H), 7.10 (t,  $J = 8.8$  Hz, 2H), 4.44 (q,  $J = 7.2$  Hz, 2H), 1.42 (t,  $J = 7.2$ Hz, 3H);  $^{13}C$  NMR (100MHz,  $CDCl_3$ ):  $\delta$  163.1 (d,  $J_{F-C} = 249$  Hz), 161.0, 153.7, 137.5, 133.7, 133.6, 131.5, 128.8, 124.9, 119.2, 118.5 (d,  $J_{F-C} = 3.4$  Hz), 116.1, 116.0, 113.1, 96.7, 83.5, 63.9, 14.1; HRMS (ESI-QTOF)  $m/z$ :  $[M+H]^+$  calcd for  $C_{18}H_{15}FNO_3$  312.1030; found 312.1036.

**ethyl 2-((2-((2-fluorophenyl)ethynyl)phenyl)amino)-2-oxoacetate (2f)**

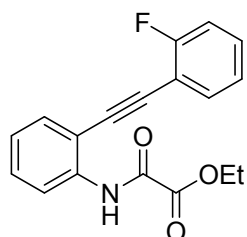

obtained as yellow solid, isolated yield 54%; mp: 72.3-74.0 °C;  $^1H$ NMR (400MHz,  $CDCl_3$ ):  $\delta$  9.83 (s, 1H), 8.49 (d,  $J = 8.4$  Hz, 1H), 7.62 (td,  $J = 7.2$ , 1.6 Hz, 1H), 7.68 (dd,  $J = 1.2$ , 7.6 Hz, 1H), 7.42-7.33 (m, 2H), 7.19-7.12 (m, 3H), 4.43 (t,  $J = 7.2$  Hz, 2H),

1.41 (t,  $J = 7.2$  Hz, 3H);  $^{13}\text{C}$  NMR (100MHz,  $\text{CDCl}_3$ ):  $\delta$  162.6 (d,  $J_{\text{F-C}} = 251$  Hz), 160.6, 154.1, 137.6, 133.4, 131.9, 130.8 (d,  $J_{\text{F-C}} = 7.8$  Hz), 130.2, 124.8, 124.3 ( $J_{\text{F-C}} = 3.7$  Hz), 119.4, 115.7 (d,  $J_{\text{F-C}} = 20.4$  Hz), 112.9, 111.1 (d,  $J_{\text{F-C}} = 15.5$  Hz), 90.8, 88.7 (d,  $J_{\text{F-C}} = 3.0$  Hz), 63.8, 14.1; HRMS (ESI-QTOF)  $m/z$ :  $[\text{M}+\text{H}]^+$  calcd for  $\text{C}_{18}\text{H}_{15}\text{FNO}_3$  312.1030; found 312.1035.

**ethyl 2-((2-(3,3-dimethylbut-1-yn-1-yl)phenyl)amino)-2-oxoacetate (2g)**

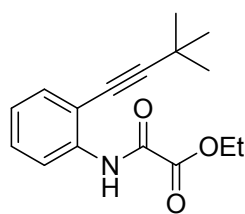

obtained as yellow viscous oil, isolated yield 43%;  $^1\text{H}$ NMR (400MHz,  $\text{CDCl}_3$ ):  $\delta$  9.81 (s, 1H), 8.43 (brd,  $J = 8.0$  Hz, 1H), 7.34 (dd,  $J = 7.6, 1.2$  Hz, 1H), 7.31 (td,  $J = 8.8, 1.2$  Hz, 1H), 7.07 (td,  $J = 7.6, 1.2$  Hz, 1H), 4.42 (q,  $J = 7.2$  Hz, 2H), 1.43 (t,  $J = 7.2$  Hz, 3H), 1.40 (s, 9H);  $^{13}\text{C}$  NMR (100MHz,  $\text{CDCl}_3$ ):  $\delta$  160.9, 153.9, 137.5, 131.5, 129.0, 124.6, 119.0, 113.9, 107.3, 73.8, 63.7, 31.0, 31.0 (overlapped), 31.0 (overlapped), 14.2; HRMS (ESI-QTOF)  $m/z$ :  $[\text{M}+\text{H}]^+$  calcd for  $\text{C}_{16}\text{H}_{20}\text{NO}_3$  274.1438; found 274.1447.

**ethyl 2-oxo-2-((2-(pent-1-yn-1-yl)phenyl)amino)acetate (2h)**

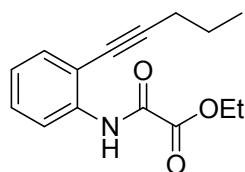

obtained as yellow viscous oil, isolated yield 41%;  $^1\text{H}$ NMR (400MHz,  $\text{CDCl}_3$ ):  $\delta$  9.80 (s, 1H), 8.43 (d,  $J = 8.4$  Hz, 1H), 7.40 (dd,  $J = 1.2, 7.6$  Hz, 1H), 7.32 (td,  $J = 1.2, 8.4$  Hz, 1H), 7.08 (td,  $J = 1.2, 7.6$  Hz, 1H), 4.42 (q,  $J = 7.2$  Hz, 2H), 2.51 (t,  $J = 7.2$  Hz, 2H), 1.72 (dt,  $J = 7.2$  Hz, 2H), 1.42 (t,  $J = 7.2$  Hz, 3H), 1.08 (t,  $J = 7.2$  Hz, 3H);  $^{13}\text{C}$  NMR (100MHz,  $\text{CDCl}_3$ ):  $\delta$  160.9, 153.9, 137.6, 131.7, 129.0, 124.7, 119.1, 114.0, 99.0, 75.4, 63.7, 22.3, 21.7, 14.2, 13.7; HRMS (ESI-QTOF)  $m/z$ :  $[\text{M}+\text{H}]^+$  calcd for  $\text{C}_{15}\text{H}_{18}\text{NO}_3$  260.1281; found 260.1288.

**ethyl 2-((4-methyl-2-(phenylethynyl)phenyl)amino)-2-oxoacetate (2i)**

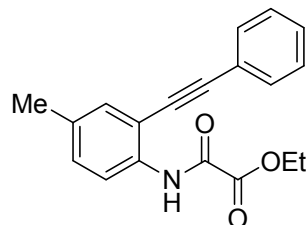

obtained as yellow viscous oil, isolated yield 33%;  $^1\text{H}$ NMR (400MHz,  $\text{CDCl}_3$ ):  $\delta$  9.88 (s, 1H), 8.36 (d,  $J = 8.4$  Hz, 1H), 7.64-7.62 (m, 2H), 7.40-7.36 (m, 5H) 7.19 (dd,  $J = 8.4, 1.6$

Hz, 1H), 4.44 (q,  $J = 7.2$  Hz, 2H), 2.34 (s, 3H), 1.42 (t,  $J = 7.2$  Hz, 3H);  $^{13}\text{C}$  NMR (100MHz,  $\text{CDCl}_3$ ):  $\delta$  161.0, 153.8, 135.2, 134.6, 131.7, 131.7 (overlapped), 130.6, 129.0, 128.7, 128.7 (overlapped), 122.4, 119.2, 113.2, 97.4, 83.9, 63.8, 20.9, 14.2; HRMS (ESI-QTOF)  $m/z$ :  $[\text{M}+\text{H}]^+$  calcd for  $\text{C}_{19}\text{H}_{19}\text{NO}_3$  308.1281; found 308.1291.

**ethyl 2-((4-methyl-2-(*p*-tolylethynyl)phenyl)amino)-2-oxoacetate (2j)**

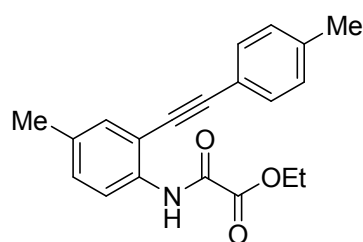

obtained as yellow solid, isolated yield 37%; mp: 125.0-127.0 °C;  $^1\text{H}$ NMR (400MHz,  $\text{CDCl}_3$ ):  $\delta$  9.87 (s, 1H), 8.36 (d,  $J = 8.4$  Hz, 1H), 7.52 (d,  $J = 8.0$  Hz, 2H), 7.34 (brs, 1H), 7.20 (d,  $J = 8.0$  Hz, 7.17 (brs, 1H), 4.44 (q,  $J = 7.2$  Hz, 2H), 2.38 (s, 3H), 2.33 (s, 3H), 1.42 (t,  $J = 7.2$  Hz, 3H);  $^{13}\text{C}$  NMR (100MHz,  $\text{CDCl}_3$ ):  $\delta$  160.9, 153.8, 139.3, 135.1, 134.6, 131.8, 131.6, 131.6 (overlapped), 130.4, 129.4, 129.4 (overlapped), 119.4, 119.2, 113.4, 97.6, 83.3, 63.8, 21.7, 20.9, 14.1; HRMS (ESI-QTOF)  $m/z$ :  $[\text{M}+\text{H}]^+$  calcd for  $\text{C}_{20}\text{H}_{20}\text{NO}_3$  322.1438; found 322.1442.

**ethyl 2-((2-((4-methoxyphenyl)ethynyl)-4-methylphenyl)amino)-2-oxoacetate (2k)**

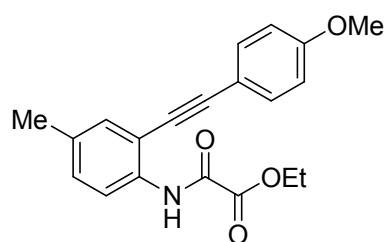

obtained as yellow solid, isolated yield 42%; mp: 78.5-80.5°C;  $^1\text{H}$ NMR (400MHz,  $\text{CDCl}_3$ ):  $\delta$  9.88 (s, 1H), 8.35 (d,  $J = 8.4$  Hz, 1H), 7.57 (d,  $J = 8.8$  Hz, 2H), 7.33 (s, 1H), 7.17 (brd,  $J = 7.6$  Hz, 1H), 6.92 (d,  $J = 8.4$  Hz, 2H), 4.43 (q,  $J = 7.2$  Hz, 2H), 3.85 (s, 3H), 2.33 (s, 3H), 1.42 (t,  $J = 7.2$  Hz, 3H);  $^{13}\text{C}$  NMR (100MHz,  $\text{CDCl}_3$ ):  $\delta$  161.0, 160.3, 153.8, 135.0, 134.6, 133.3, 133.3(overlapped), 131.7, 130.2, 119.1, 114.5, 114.4, 114.4 (overlapped), 113.6, 97.5, 82.7, 63.8, 55.5, 21.0, 14.2; HRMS (ESI-QTOF)  $m/z$ :  $[\text{M}+\text{H}]^+$  calcd for  $\text{C}_{20}\text{H}_{20}\text{NO}_4$  338.1387; found 338.1394.

**ethyl 2-((2-((4-fluorophenyl)ethynyl)-4-methylphenyl)amino)-2-oxoacetate (2l)**

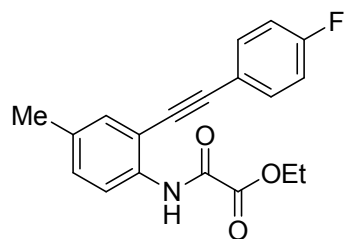

obtained as yellow viscous oil, isolated yield 39%;

<sup>1</sup>HNMR (400MHz, CDCl<sub>3</sub>): δ 9.85 (s, 1H), 8.36 (d, *J* = 8.4 Hz, 1H), 7.63-7.60 (m, 2H), 7.33 (brs, 1H), 7.20 (brd, *J* = 8.4 Hz, 1H), 7.09 (t, *J* = 8.4 Hz, 2H), 4.43 (q, *J* = 7.2 Hz, 2H), 2.33 (s, 3H), 1.42 (t, *J* = 7.2 Hz, 3H); <sup>13</sup>C NMR (100MHz, CDCl<sub>3</sub>): δ 162.9 (d, *J*<sub>F-C</sub> = 249.0 Hz), 160.9, 153.6, 135.0, 134.5, 133.6, 133.5, 131.7, 130.5, 119.1, 118.4 (d, *J*<sub>F-C</sub> = 3.5 Hz), 116.0, 115.8, 112.8, 96.1, 83.6, 63.7, 20.8, 14.0; HRMS (ESI-QTOF) *m/z*: [M+H]<sup>+</sup> calcd for C<sub>19</sub>H<sub>17</sub>FNO<sub>3</sub> 326.1187; found 326.1192.

**ethyl 2-((2-((2-fluorophenyl)ethynyl)-4-methylphenyl)amino)-2-oxoacetate (2m)**

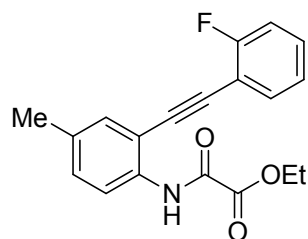

obtained as yellow viscous oil, isolated yield 32%; <sup>1</sup>HNMR (400MHz, CDCl<sub>3</sub>): δ 9.76 (s, 1H), 8.37 (d, *J* = 8.4 Hz, 1H), 7.61 (td, *J* = 1.2, 8.4 Hz, 1H), 7.39-7.35 (m, 2H), 7.23-7.15 (m, 3H), 4.44 (q, *J* = 7.2 Hz, 2H), 2.34 (s, 3H), 1.42 (t, *J* = 7.2 Hz); <sup>13</sup>C NMR (100MHz, CDCl<sub>3</sub>): δ 162.6 (d, *J*<sub>F-C</sub> = 250.8 Hz), 160.7, 154.0, 135.3, 134.7, 133.5, 131.0, 130.7 (d, *J*<sub>F-C</sub> = 7.9 Hz), 124.5 (d, *J*<sub>F-C</sub> = 2.7 Hz), 119.5, 115.8 (d, *J*<sub>F-C</sub> = 30.5 Hz), 112.8, 111.2 (d, *J*<sub>F-C</sub> = 5.7 Hz), 90.4, 89.0 (d, *J*<sub>F-C</sub> = 3.2 Hz), 63.8, 20.9, 14.1; HRMS (ESI-QTOF) *m/z*: [M+H]<sup>+</sup> calcd for C<sub>19</sub>H<sub>17</sub>FNO<sub>3</sub> 326.1187; found 326.1198.

**ethyl 2-((4-fluoro-2-(phenylethynyl)phenyl)amino)-2-oxoacetate (2n)**

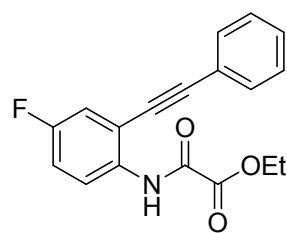

obtained as yellow solid, isolated yield 69%; mp: 84.0-86.0°C; <sup>1</sup>HNMR (400MHz, CDCl<sub>3</sub>): δ 9.87 (s, 1H), 8.48 (dd, *J* = 4.2, 9.2 Hz, 1H), 7.66-7.3 (m, 2H), 7.42-7.40 (m, 3H) 7.23 (dd, *J* = 0.7, 8.2 Hz, 1H), 7.10 (td, *J* = 0.7, 9.2 Hz, 1H), 4.45 (q, *J* = 7.2 Hz, 2H), 1.43 (t, *J* = 7.2 Hz, 3H); <sup>13</sup>C NMR (100MHz, CDCl<sub>3</sub>): δ 160.8, 159.0 (d, *J*<sub>F-C</sub> = 243.9 Hz), 153.8, 134.0, 131.8, 131.8 (overlapped), 129.5, 128.8, 121.8, 120.9 (d, *J*<sub>F-C</sub> = 8.2 Hz), 118.0 (d, *J*<sub>F-C</sub> = 2.4 Hz), 116.8 (d, *J*<sub>F-C</sub> = 22.3 Hz), 114.9 (d, *J*<sub>F-C</sub> = 9.8 Hz), 98.6, 82.7 (d, *J*<sub>F-C</sub> = 3.2 Hz), 64.0, 14.2; HRMS (ESI-QTOF) *m/z*: [M+H]<sup>+</sup> calcd for C<sub>18</sub>H<sub>15</sub>FNO<sub>3</sub> 312.1030; found 312.1031.

**ethyl 2-((4-fluoro-2-(p-tolyethynyl)phenyl)amino)-2-oxoacetate (2o)**



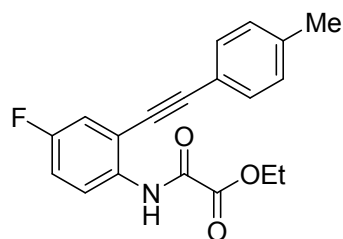

obtained as yellow solid, isolated yield 55%; mp: 107.5-109.5°C;  $^1\text{H}$ NMR (400MHz,  $\text{CDCl}_3$ ):  $\delta$  9.87 (s, 1H), 8.46 (dd,  $J = 5.2, 9.2$  Hz, 1H), 7.53 (d,  $J = 8.4$  Hz, 2H), 7.23-7.20 (m, 3H), 7.08 (td,  $J = 2.8, 8.4$  Hz, 1H), 4.44 (q,  $J = 7.2$  Hz, 2H), 2.39 (s, 3H), 1.42 (t,  $J = 7.2$  Hz, 3H);  $^{13}\text{C}$  NMR (100MHz,  $\text{CDCl}_3$ ):  $\delta$  160.8, 159.0 (d,  $J_{\text{F-C}} = 243.8$  Hz), 153.8, 139.8, 133.9, 131.8, 131.8 (overlapped), 129.5, 129.5 (overlapped), 120.8 (d,  $J_{\text{F-C}} = 8.5$  Hz), 118.8, 117.9 (d,  $J_{\text{F-C}} = 24.3$  Hz), 116.6 (d,  $J_{\text{F-C}} = 22.3$  Hz), 115.2 (d,  $J_{\text{F-C}} = 8.7$  Hz), 98.9, 82.2, 3.9, 21.8, 14.2; HRMS (ESI-QTOF) m/z:  $[\text{M}+\text{H}]^+$  calcd for  $\text{C}_{19}\text{H}_{17}\text{FNO}_3$  326.1187; found 326.1193.

**ethyl 2-((4-fluoro-2-((2-fluorophenyl)ethynyl)phenyl)amino)-2-oxoacetate (2p)**

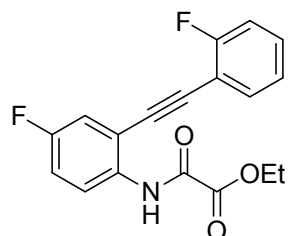

obtained as yellow solid, isolated yield 56%; mp: 93.7-95.0°C;  $^1\text{H}$ NMR (400MHz,  $\text{CDCl}_3$ ):  $\delta$  9.76 (s, 1H), 8.48 (dd,  $J = 9.2, 5.2$  Hz, 1H), 7.62 (td,  $J = 7.2, 1.2$  Hz, 1H), 7.42-7.36 (m, 1H), 7.27-7.24 (m, 1H), 7.20-7.12 (m, 3H), 4.44 (q,  $J = 7.2$  Hz, 2H), 1.42 (t,  $J = 7.2$  Hz, 3H);  $^{13}\text{C}$  NMR (100MHz,  $\text{CDCl}_3$ ):  $\delta$  162.7 (d,  $J_{\text{F-C}} = 251.5$  Hz), 160.6, 159.0 (d,  $J_{\text{F-C}} = 244$  Hz), 154.0, 134.0 (d,  $J_{\text{F-C}} = 2.6$  Hz), 133.5, 131.3 (d,  $J_{\text{F-C}} = 7.9$  Hz), 124.4 (d,  $J_{\text{F-C}} = 3.7$  Hz), 121.2 (d,  $J_{\text{F-C}} = 8.2$  Hz), 118.3 (d,  $J_{\text{F-C}} = 24.3$  Hz), 117.2 ( $J_{\text{F-C}} = 22.1$  Hz), 115.8 (d,  $J_{\text{F-C}} = 30.3$  Hz), 114.5 (d,  $J_{\text{F-C}} = 19.6$  Hz), 110.6 (d,  $J_{\text{F-C}} = 15.5$  Hz), 91.6, 87.7, 63.9, 14.1; HRMS (ESI-QTOF) m/z:  $[\text{M}+\text{H}]^+$  calcd for  $\text{C}_{18}\text{H}_{14}\text{F}_2\text{NO}_3$  330.0936; found 330.0932.

**ethyl 2-((4-chloro-2-((4-fluorophenyl)ethynyl)phenyl)amino)-2-oxoacetate (2q)**

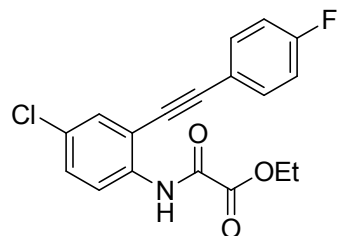

obtained as yellow solid, isolated yield 49%; mp: 106.0-108.0°C;  $^1\text{H}$ NMR (400MHz,  $\text{CDCl}_3$ ):  $\delta$  9.87 (s, 1H), 8.44 (d,  $J = 8.8$  Hz, 1H), 7.63-7.60 (m, 2H), 7.48 (d,  $J = 2.4$  Hz, 1H), 7.34 (dd,  $J = 8.8, 2.4$  Hz, 1H), 7.10 (t,  $J = 8.8$  Hz, 2H), 4.44 (q,  $J = 7.2$  Hz, 2H), 1.43 (t,  $J = 7.2$  Hz, 3H);  $^{13}\text{C}$  NMR (100MHz,  $\text{CDCl}_3$ ):  $\delta$  163.3 (d,  $J_{\text{F-C}} = 250$  Hz), 160.8, 153.8, 136.1, 133.9, 133.8, 131.0, 129.9, 120.3, 118.0, 117.9, 116.3, 116.1, 114.7, 97.8, 82.3, 64.0, 14.1; HRMS (ESI-QTOF)

m/z: [M+H]<sup>+</sup> calcd for C<sub>18</sub>H<sub>14</sub>ClFNO<sub>3</sub> 346.0641; found 346.0645.

***ethyl 2-((4-chloro-2-((2-fluorophenyl)ethynyl)phenyl)amino)-2-oxoacetate (2r)***

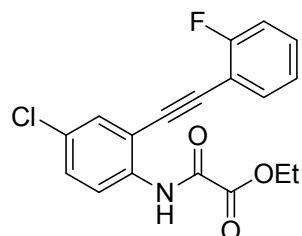

obtained as yellow solid, isolated yield 38%; mp: 112.0-113.8°C; <sup>1</sup>HNMR (400MHz, CDCl<sub>3</sub>): δ 9.81 (s, 1H), 8.47 (d, *J* = 8.8 Hz, 1H), 7.66-7.60 (m, 2H), 7.56-7.55 (m, 1H), 7.39-7.36 (m, 2H), 7.20-7.16 (m, 2H), 4.44 (q, *J* = 7.2 Hz, 2H), 1.42 (t, *J* = 7.2 Hz, 3H); <sup>13</sup>C NMR (100MHz, CDCl<sub>3</sub>): δ 162.8 (d, *J* = 150 Hz), 160.5, 154.1, 136.2, 133.6, 131.5, 131.3 (d, *J*<sub>F-C</sub> = 8.2 Hz), 130.3, 130.0, 124.4 (d, *J*<sub>F-C</sub> = 3.4 Hz), 120.6, 116.0, 115.8, 114.5, 91.9, 87.6, 64.0, 14.2; HRMS (ESI-QTOF) m/z: [M+H]<sup>+</sup> calcd for C<sub>18</sub>H<sub>14</sub>ClFNO<sub>3</sub> 346.0641; found 346.0651.

***Representative experimental procedure for synthesis of 2-aryl indoles (12) with N-2-alkynylphenyl oxalic amides (2) as starting materials:***

To a 10 mL scintillation flask was charged with **2** (0.5 mmol), AgNO<sub>3</sub> (20 mol%), K<sub>2</sub>CO<sub>3</sub> (2.0 eq) and MeCN (4 mL). The reaction mixture was stirred at 70°C for 2 h. The resulting mixture was poured into 30 mL water and then extracted with AcOEt (20 mL × 3). The combined organic layers were washed with brine and dried over MgSO<sub>4</sub>. The solvent were removed via vacuo and the residue was purified by flash column chromatography (SiO<sub>2</sub>) with hexane/acetone (40:1) to give compounds **12**.

***Characterization data of compounds 12***

***2-phenyl-1H-indole (12a)***

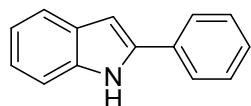

obtained as white amorphous powder, isolated yield 95%; <sup>1</sup>HNMR (400MHz, CDCl<sub>3</sub>): δ 8.34(s, 1H), 7.67-7.64 (m, 3H), 7.45 (t, *J* = 8.0 Hz, 2H), 7.41 (dd, *J* = 8.0, 0.8 Hz, 1H), 7.34 (t, *J* = 7.6 Hz, 1H), 7.21(td, *J* = 7.2, 1.2 Hz, 1H), 7.14 (td, *J* = 8.0, 1.2 Hz, 1H), 6.84 (dd, *J* = 1.5, 0.8 Hz, 1H, NH); <sup>13</sup>C NMR (100MHz, CDCl<sub>3</sub>): δ 138.0, 137.0, 132.5, 129.4, 129.2, 129.2

(overlapped), 127.8, 125.3, 125.3 (overlapped), 122.5, 120.8, 120.4, 111.0, 100.1;  
HRMS (ESI-QTOF) m/z: [M+H]<sup>+</sup> calcd for C<sub>14</sub>H<sub>12</sub>N 194.0964; found 194.0960.

### **2-(*p*-tolyl)-1H-indole (12b)**

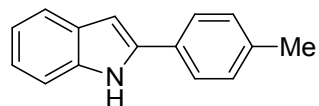

obtained as white amorphous powder, isolated yield 91%;  
<sup>1</sup>HNMR (400MHz, CDCl<sub>3</sub>): δ 8.30 (s, 1H), 7.62 (d, *J* = 8.0Hz, 1H), 7.56 (d, *J* = 8.0 Hz, 2H), 7.39 (d, *J* = 8.0 Hz, 1H), 7.26 (d, *J* = 8.0 Hz, 2H), 7.19 (t, *J* = 7.2 Hz, 1H), 7.12 (t, *J* = 7.2 Hz, 1H), 6.79 (d, *J* = 1.2 Hz, 1H), 2.40 (s, 3H); <sup>13</sup>C NMR (100MHz, CDCl<sub>3</sub>): δ 138.2, 137.8, 136.8, 129.8, 129.8 (overlapped), 129.7, 129.5, 125.2, 125.2 (overlapped), 122.3, 120.7, 120.3, 110.9, 99.6, 21.4;  
HRMS (ESI-QTOF) m/z: [M+H]<sup>+</sup> calcd for C<sub>15</sub>H<sub>14</sub>N 208.1121; found 208.1113.

### **5-fluoro-2-(2-fluorophenyl)-1H-indole (12c)**

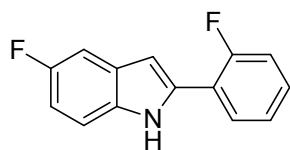

obtained as white amorphous powder, isolated yield 88%;  
<sup>1</sup>HNMR (400MHz, CDCl<sub>3</sub>): δ 8.87 (s, 1H), 7.71 (brt, *J* = 8.0 Hz, 1H), 7.34-7.16 (m, 5H), 6.96 (brt, *J* = 8.8 Hz, 1H), 6.90 (s, 1H); <sup>13</sup>C NMR (100MHz, CDCl<sub>3</sub>): δ 159.4 (d, *J*<sub>F-C</sub> = 245 Hz), 158.3 (d, *J* = 245.0 Hz), 134.5, 133.3, 129.5 (d, *J*<sub>F-C</sub> = 9.0 Hz), 128.6 (d, *J*<sub>F-C</sub> = 10.1 Hz), 128.2 (d, *J*<sub>F-C</sub> = 4.0 Hz), 125.0(d, *J*<sub>F-C</sub> = 3.1 Hz), 119.7 (d, *J*<sub>F-C</sub> = 10.1 Hz), 116.7 (d, *J*<sub>F-C</sub> = 23.0 Hz), 111.8 (d, *J*<sub>F-C</sub> = 9.6 Hz), 111.3 (d, *J*<sub>F-C</sub> = 26.4 Hz), 105.4 (d, *J*<sub>F-C</sub> = 23.4 Hz), 101.7 (dd, *J*<sub>F-C</sub> = 4.7, 4.7 Hz); HRMS (ESI-QTOF) m/z: [M+H]<sup>+</sup> calcd for C<sub>14</sub>H<sub>10</sub>F<sub>2</sub>N 230.0776; found 230.0783.

### **2-(4-fluorophenyl)-1H-indole (12d)**

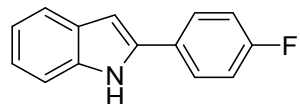

obtained as white amorphous powder, isolated yield 90%;  
<sup>1</sup>HNMR (400MHz, CDCl<sub>3</sub>): δ 8.27 (s, 1H), 7.64-7.61 (m, 3H), 7.40 (brd, *J* = 8.0 Hz, 1H), 7.20 (td, *J* = 8.0, 1.2 Hz, 1H), 7.16-7.12 (m, 3H), 6.76 (d, *J* = 1.2 Hz, 1H); <sup>13</sup>C NMR (100MHz, CDCl<sub>3</sub>): δ 162.6 (d, *J*<sub>F-C</sub> = 246 Hz), 137.2, 137.0, 129.4, 128.8 (*J*<sub>F-C</sub> = 3.1 Hz), 127.1, 127.0, 122.6, 120.8, 120.5, 116.3, 116.1, 111.0, 100.1; HRMS (ESI-QTOF) m/z: [M+H]<sup>+</sup> calcd for C<sub>14</sub>H<sub>11</sub>FN 212.0876; found 212.0869.

**Table s1.** Crystal data and structure refinement for compound **2q**.

|                                   |                                                                                                                      |
|-----------------------------------|----------------------------------------------------------------------------------------------------------------------|
| Identification code               | mo_2q_0m                                                                                                             |
| Empirical formula                 | C <sub>18</sub> H <sub>13</sub> ClFNO <sub>3</sub>                                                                   |
| Formula weight                    | 345.74                                                                                                               |
| Temperature                       | 100(2) K                                                                                                             |
| Wavelength                        | 0.71073 Å                                                                                                            |
| Crystal system, space group       | Monoclinic, P 2 <sub>1</sub> /n                                                                                      |
| Unit cell dimensions              | a = 14.191(2) Å    alpha = 90 deg.<br>b = 4.4973(7) Å    beta = 95.570(2) deg.<br>c = 25.988(4) Å    gamma = 90 deg. |
| Volume                            | 1650.7(4) Å <sup>3</sup>                                                                                             |
| Z, Calculated density             | 4, 1.391 Mg/m <sup>3</sup>                                                                                           |
| Absorption coefficient            | 0.257 mm <sup>-1</sup>                                                                                               |
| F(000)                            | 712                                                                                                                  |
| Crystal size                      | 0.70 x 0.06 x 0.05 mm                                                                                                |
| Theta range for data collection   | 1.57 to 28.30 deg.                                                                                                   |
| Limiting indices                  | -18<=h<=18, -5<=k<=5, -34<=l<=34                                                                                     |
| Reflections collected / unique    | 15559 / 4056 [R(int) = 0.0691]                                                                                       |
| Completeness to theta = 28.30     | 99.7 %                                                                                                               |
| Absorption correction             | Semi-empirical from equivalents                                                                                      |
| Max. and min. transmission        | 0.9873 and 0.8404                                                                                                    |
| Refinement method                 | Full-matrix least-squares on F <sup>2</sup>                                                                          |
| Data / restraints / parameters    | 4056 / 0 / 218                                                                                                       |
| Goodness-of-fit on F <sup>2</sup> | 1.049                                                                                                                |
| Final R indices [I>2sigma(I)]     | R1 = 0.0596, wR2 = 0.1059                                                                                            |
| R indices (all data)              | R1 = 0.0986, wR2 = 0.1197                                                                                            |
| Largest diff. peak and hole       | 0.382 and -0.358 e.Å <sup>-3</sup>                                                                                   |

**Table s2.** Atomic coordinates ( $\times 10^4$ ) and equivalent isotropic displacement parameters ( $\text{Å}^2 \times 10^3$ ) for compound **2q**.  $U(\text{eq})$  is defined as one third of the trace of the orthogonalized  $U_{ij}$  tensor.

|       | x        | y        | z       | $U(\text{eq})$ |
|-------|----------|----------|---------|----------------|
| Cl(1) | -4050(1) | 14864(2) | 500(1)  | 22(1)          |
| F(1)  | 269(1)   | -1630(4) | 3316(1) | 38(1)          |
| O(1)  | 2275(1)  | 9804(4)  | 848(1)  | 25(1)          |
| O(2)  | 1399(1)  | 7474(5)  | 1398(1) | 54(1)          |
| O(3)  | 750(1)   | 12663(6) | 448(1)  | 70(1)          |
| N(1)  | -174(1)  | 10129(5) | 966(1)  | 18(1)          |
| C(1)  | -107(2)  | 394(6)   | 2966(1) | 24(1)          |
| C(2)  | -1018(2) | 1345(6)  | 3000(1) | 24(1)          |
| C(3)  | -1407(2) | 3381(5)  | 2637(1) | 19(1)          |
| C(4)  | -875(2)  | 4413(5)  | 2249(1) | 16(1)          |
| C(5)  | -1269(2) | 6488(5)  | 1864(1) | 17(1)          |
| C(6)  | -1572(2) | 8183(5)  | 1536(1) | 15(1)          |
| C(7)  | -1810(1) | 10278(5) | 1129(1) | 14(1)          |
| C(8)  | -1084(2) | 11285(5) | 835(1)  | 14(1)          |
| C(9)  | 646(2)   | 10870(6) | 776(1)  | 23(1)          |
| C(10) | 1480(2)  | 9127(6)  | 1046(1) | 22(1)          |
| C(11) | 3129(2)  | 8324(7)  | 1080(1) | 31(1)          |
| C(12) | 3924(2)  | 9278(7)  | 779(1)  | 30(1)          |
| C(13) | -2727(2) | 11387(5) | 1017(1) | 16(1)          |
| C(14) | -2909(2) | 13440(5) | 626(1)  | 16(1)          |
| C(15) | -2198(2) | 14425(5) | 334(1)  | 17(1)          |
| C(16) | -1286(2) | 13334(5) | 440(1)  | 17(1)          |
| C(17) | 55(2)    | 3401(6)  | 2230(1) | 21(1)          |
| C(18) | 441(2)   | 1358(6)  | 2591(1) | 26(1)          |

**Table s3.** Bond lengths [Å] and angles [deg] for compound **2q**

---

|                  |            |
|------------------|------------|
| Cl(1)-C(14)      | 1.742(2)   |
| F(1)-C(1)        | 1.357(3)   |
| O(1)-C(10)       | 1.320(3)   |
| O(1)-C(11)       | 1.459(3)   |
| O(2)-C(10)       | 1.194(3)   |
| O(3)-C(9)        | 1.192(3)   |
| N(1)-C(9)        | 1.349(3)   |
| N(1)-C(8)        | 1.403(3)   |
| N(1)-H(1)        | 0.8800     |
| C(1)-C(18)       | 1.376(4)   |
| C(1)-C(2)        | 1.373(3)   |
| C(2)-C(3)        | 1.389(3)   |
| C(2)-H(2)        | 0.9500     |
| C(3)-C(4)        | 1.397(3)   |
| C(3)-H(3A)       | 0.9500     |
| C(4)-C(17)       | 1.401(3)   |
| C(4)-C(5)        | 1.440(3)   |
| C(5)-C(6)        | 1.192(3)   |
| C(6)-C(7)        | 1.433(3)   |
| C(7)-C(13)       | 1.397(3)   |
| C(7)-C(8)        | 1.416(3)   |
| C(8)-C(16)       | 1.389(3)   |
| C(9)-C(10)       | 1.532(3)   |
| C(11)-C(12)      | 1.496(3)   |
| C(11)-H(11A)     | 0.9900     |
| C(11)-H(11B)     | 0.9900     |
| C(12)-H(12A)     | 0.9800     |
| C(12)-H(12B)     | 0.9800     |
| C(12)-H(12C)     | 0.9800     |
| C(13)-C(14)      | 1.380(3)   |
| C(13)-H(13)      | 0.9500     |
| C(14)-C(15)      | 1.392(3)   |
| C(15)-C(16)      | 1.387(3)   |
| C(15)-H(15)      | 0.9500     |
| C(16)-H(16)      | 0.9500     |
| C(17)-C(18)      | 1.386(3)   |
| C(17)-H(17)      | 0.9500     |
| C(18)-H(18)      | 0.9500     |
| C(10)-O(1)-C(11) | 116.24(19) |
| C(9)-N(1)-C(8)   | 128.7(2)   |
| C(9)-N(1)-H(1)   | 115.6      |

|                     |            |
|---------------------|------------|
| C(8)-N(1)-H(1)      | 115.6      |
| F(1)-C(1)-C(18)     | 118.2(2)   |
| F(1)-C(1)-C(2)      | 118.5(2)   |
| C(18)-C(1)-C(2)     | 123.2(2)   |
| C(1)-C(2)-C(3)      | 118.4(2)   |
| C(1)-C(2)-H(2)      | 120.8      |
| C(3)-C(2)-H(2)      | 120.8      |
| C(2)-C(3)-C(4)      | 120.2(2)   |
| C(2)-C(3)-H(3A)     | 119.9      |
| C(4)-C(3)-H(3A)     | 119.9      |
| C(3)-C(4)-C(17)     | 119.5(2)   |
| C(3)-C(4)-C(5)      | 121.1(2)   |
| C(17)-C(4)-C(5)     | 119.3(2)   |
| C(6)-C(5)-C(4)      | 177.9(2)   |
| C(5)-C(6)-C(7)      | 172.5(2)   |
| C(13)-C(7)-C(8)     | 119.1(2)   |
| C(13)-C(7)-C(6)     | 122.41(19) |
| C(8)-C(7)-C(6)      | 118.50(19) |
| C(16)-C(8)-N(1)     | 122.97(19) |
| C(16)-C(8)-C(7)     | 120.2(2)   |
| N(1)-C(8)-C(7)      | 116.9(2)   |
| O(3)-C(9)-N(1)      | 126.8(2)   |
| O(3)-C(9)-C(10)     | 122.0(2)   |
| N(1)-C(9)-C(10)     | 111.2(2)   |
| O(2)-C(10)-O(1)     | 126.2(2)   |
| O(2)-C(10)-C(9)     | 122.9(2)   |
| O(1)-C(10)-C(9)     | 110.8(2)   |
| O(1)-C(11)-C(12)    | 107.0(2)   |
| O(1)-C(11)-H(11A)   | 110.3      |
| C(12)-C(11)-H(11A)  | 110.3      |
| O(1)-C(11)-H(11B)   | 110.3      |
| C(12)-C(11)-H(11B)  | 110.3      |
| H(11A)-C(11)-H(11B) | 108.6      |
| C(11)-C(12)-H(12A)  | 109.5      |
| C(11)-C(12)-H(12B)  | 109.5      |
| H(12A)-C(12)-H(12B) | 109.5      |
| C(11)-C(12)-H(12C)  | 109.5      |
| H(12A)-C(12)-H(12C) | 109.5      |
| H(12B)-C(12)-H(12C) | 109.5      |
| C(14)-C(13)-C(7)    | 119.8(2)   |
| C(14)-C(13)-H(13)   | 120.1      |
| C(7)-C(13)-H(13)    | 120.1      |
| C(13)-C(14)-C(15)   | 121.3(2)   |
| C(13)-C(14)-Cl(1)   | 119.29(17) |

|                   |            |
|-------------------|------------|
| C(15)-C(14)-Cl(1) | 119.37(18) |
| C(16)-C(15)-C(14) | 119.5(2)   |
| C(16)-C(15)-H(15) | 120.3      |
| C(14)-C(15)-H(15) | 120.3      |
| C(8)-C(16)-C(15)  | 120.2(2)   |
| C(8)-C(16)-H(16)  | 119.9      |
| C(15)-C(16)-H(16) | 119.9      |
| C(18)-C(17)-C(4)  | 120.2(2)   |
| C(18)-C(17)-H(17) | 119.9      |
| C(4)-C(17)-H(17)  | 119.9      |
| C(1)-C(18)-C(17)  | 118.4(2)   |
| C(1)-C(18)-H(18)  | 120.8      |
| C(17)-C(18)-H(18) | 120.8      |

---

Symmetry transformations used to generate equivalent atoms:



**Table s4.** Anisotropic displacement parameters ( $\text{\AA}^2 \times 10^3$ ) for compound **2q**.

The anisotropic displacement factor exponent takes the form:

$$-2 \pi^2 [ h^2 a^{*2} U11 + \dots + 2 h k a^* b^* U12 ]$$

|       | U11   | U22    | U33   | U23    | U13    | U12   |
|-------|-------|--------|-------|--------|--------|-------|
| Cl(1) | 14(1) | 31(1)  | 22(1) | 0(1)   | -2(1)  | 6(1)  |
| F(1)  | 54(1) | 31(1)  | 27(1) | 9(1)   | -10(1) | 9(1)  |
| O(1)  | 13(1) | 36(1)  | 26(1) | 6(1)   | 3(1)   | 5(1)  |
| O(2)  | 21(1) | 75(2)  | 67(2) | 54(1)  | 9(1)   | 13(1) |
| O(3)  | 19(1) | 110(2) | 82(2) | 81(2)  | 16(1)  | 18(1) |
| N(1)  | 15(1) | 22(1)  | 18(1) | 8(1)   | 3(1)   | 3(1)  |
| C(1)  | 38(1) | 17(1)  | 16(1) | 3(1)   | -10(1) | 2(1)  |
| C(2)  | 36(1) | 20(1)  | 14(1) | 0(1)   | 2(1)   | -2(1) |
| C(3)  | 24(1) | 17(1)  | 15(1) | -1(1)  | 0(1)   | -2(1) |
| C(4)  | 22(1) | 12(1)  | 13(1) | -1(1)  | -3(1)  | -2(1) |
| C(5)  | 18(1) | 18(1)  | 16(1) | -3(1)  | 3(1)   | -4(1) |
| C(6)  | 14(1) | 17(1)  | 15(1) | -1(1)  | 2(1)   | -2(1) |
| C(7)  | 16(1) | 15(1)  | 11(1) | -2(1)  | 0(1)   | 0(1)  |
| C(8)  | 13(1) | 17(1)  | 12(1) | -1(1)  | -2(1)  | 1(1)  |
| C(9)  | 16(1) | 32(2)  | 20(1) | 10(1)  | 2(1)   | 4(1)  |
| C(10) | 16(1) | 27(1)  | 24(1) | 4(1)   | 2(1)   | 2(1)  |
| C(11) | 15(1) | 36(2)  | 42(2) | 8(1)   | 0(1)   | 9(1)  |
| C(12) | 15(1) | 46(2)  | 29(2) | -13(1) | 0(1)   | 4(1)  |
| C(13) | 14(1) | 19(1)  | 16(1) | -5(1)  | 2(1)   | -2(1) |
| C(14) | 14(1) | 21(1)  | 14(1) | -3(1)  | -2(1)  | 2(1)  |
| C(15) | 19(1) | 20(1)  | 12(1) | 1(1)   | -2(1)  | 3(1)  |
| C(16) | 16(1) | 21(1)  | 14(1) | 1(1)   | 1(1)   | 0(1)  |
| C(17) | 24(1) | 22(1)  | 17(1) | -2(1)  | 1(1)   | -1(1) |
| C(18) | 26(1) | 22(1)  | 27(1) | -2(1)  | -6(1)  | 2(1)  |

**Table s5.** Hydrogen coordinates (  $\times 10^4$ ) and isotropic displacement parameters ( $\text{\AA}^2 \times 10^3$ ) for compound **2q**.

|        | x     | y     | z    | U(eq) |
|--------|-------|-------|------|-------|
| H(1)   | -132  | 8732  | 1204 | 22    |
| H(2)   | -1374 | 629   | 3266 | 28    |
| H(3A)  | -2036 | 4073  | 2654 | 23    |
| H(11A) | 3050  | 6138  | 1061 | 38    |
| H(11B) | 3260  | 8905  | 1447 | 38    |
| H(12A) | 3802  | 8590  | 421  | 45    |
| H(12B) | 4518  | 8417  | 935  | 45    |
| H(12C) | 3971  | 11452 | 784  | 45    |
| H(13)  | -3223 | 10730 | 1210 | 19    |
| H(15)  | -2337 | 15834 | 65   | 21    |
| H(16)  | -797  | 13991 | 241  | 20    |
| H(17)  | 423   | 4118  | 1970 | 25    |
| H(18)  | 1068  | 641   | 2579 | 31    |

**Table s6.** Torsion angles [deg] for compound **2q**.

---

|                         |             |
|-------------------------|-------------|
| F(1)-C(1)-C(2)-C(3)     | -179.0(2)   |
| C(18)-C(1)-C(2)-C(3)    | 0.0(4)      |
| C(1)-C(2)-C(3)-C(4)     | 0.1(4)      |
| C(2)-C(3)-C(4)-C(17)    | -0.6(3)     |
| C(2)-C(3)-C(4)-C(5)     | 179.0(2)    |
| C(3)-C(4)-C(5)-C(6)     | -163(7)     |
| C(17)-C(4)-C(5)-C(6)    | 17(7)       |
| C(4)-C(5)-C(6)-C(7)     | -33(9)      |
| C(5)-C(6)-C(7)-C(13)    | -172.4(18)  |
| C(5)-C(6)-C(7)-C(8)     | 7(2)        |
| C(9)-N(1)-C(8)-C(16)    | 5.0(4)      |
| C(9)-N(1)-C(8)-C(7)     | -174.6(2)   |
| C(13)-C(7)-C(8)-C(16)   | -0.4(3)     |
| C(6)-C(7)-C(8)-C(16)    | -179.4(2)   |
| C(13)-C(7)-C(8)-N(1)    | 179.3(2)    |
| C(6)-C(7)-C(8)-N(1)     | 0.2(3)      |
| C(8)-N(1)-C(9)-O(3)     | -1.1(5)     |
| C(8)-N(1)-C(9)-C(10)    | 177.7(2)    |
| C(11)-O(1)-C(10)-O(2)   | 1.5(4)      |
| C(11)-O(1)-C(10)-C(9)   | 179.0(2)    |
| O(3)-C(9)-C(10)-O(2)    | 174.7(3)    |
| N(1)-C(9)-C(10)-O(2)    | -4.1(4)     |
| O(3)-C(9)-C(10)-O(1)    | -2.9(4)     |
| N(1)-C(9)-C(10)-O(1)    | 178.3(2)    |
| C(10)-O(1)-C(11)-C(12)  | 176.8(2)    |
| C(8)-C(7)-C(13)-C(14)   | -0.2(3)     |
| C(6)-C(7)-C(13)-C(14)   | 178.9(2)    |
| C(7)-C(13)-C(14)-C(15)  | 0.5(4)      |
| C(7)-C(13)-C(14)-Cl(1)  | -178.66(17) |
| C(13)-C(14)-C(15)-C(16) | -0.3(4)     |
| Cl(1)-C(14)-C(15)-C(16) | 178.87(18)  |
| N(1)-C(8)-C(16)-C(15)   | -179.1(2)   |
| C(7)-C(8)-C(16)-C(15)   | 0.6(3)      |
| C(14)-C(15)-C(16)-C(8)  | -0.3(3)     |
| C(3)-C(4)-C(17)-C(18)   | 0.9(4)      |
| C(5)-C(4)-C(17)-C(18)   | -178.7(2)   |
| F(1)-C(1)-C(18)-C(17)   | 179.3(2)    |
| C(2)-C(1)-C(18)-C(17)   | 0.3(4)      |
| C(4)-C(17)-C(18)-C(1)   | -0.8(4)     |

---

Symmetry transformations used to generate equivalent atoms:

**Table s7.** Hydrogen bonds for compound **2q** [A and deg.].

---

| D-H...A | d(D-H) | d(H...A) | d(D...A) | <(DHA) |
|---------|--------|----------|----------|--------|
|---------|--------|----------|----------|--------|

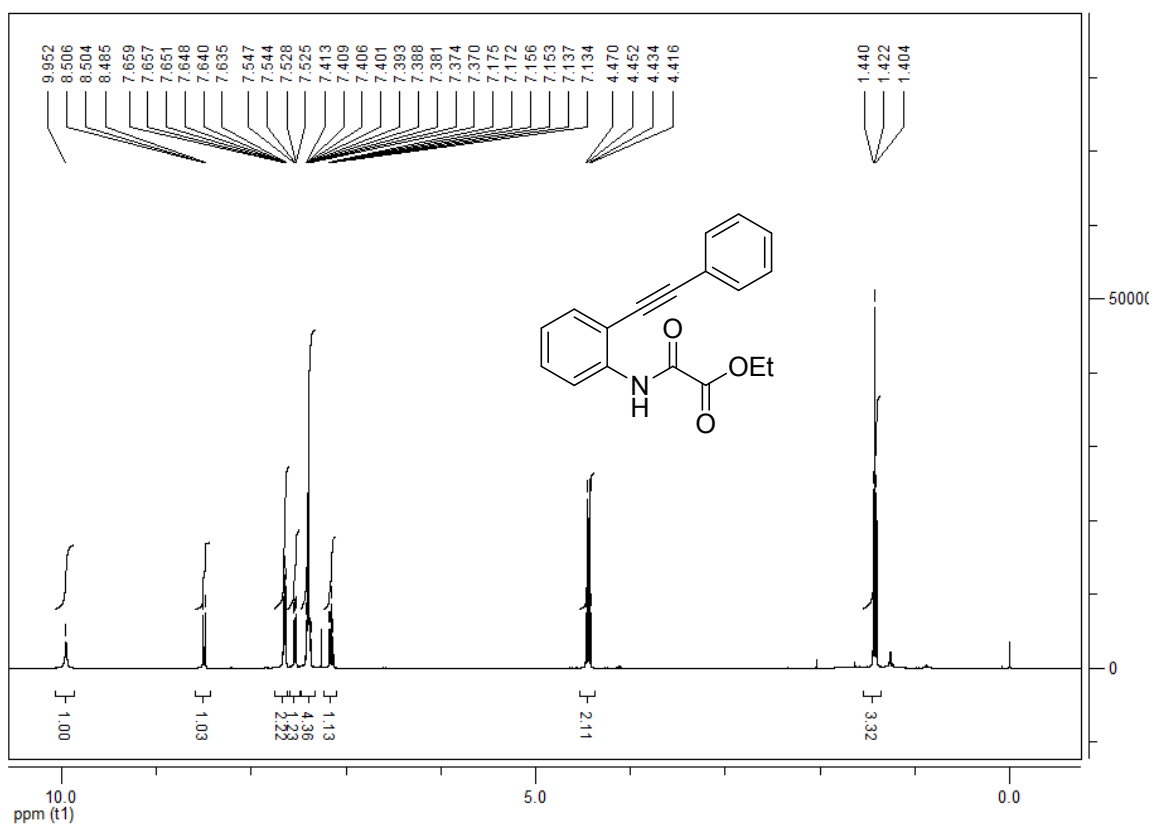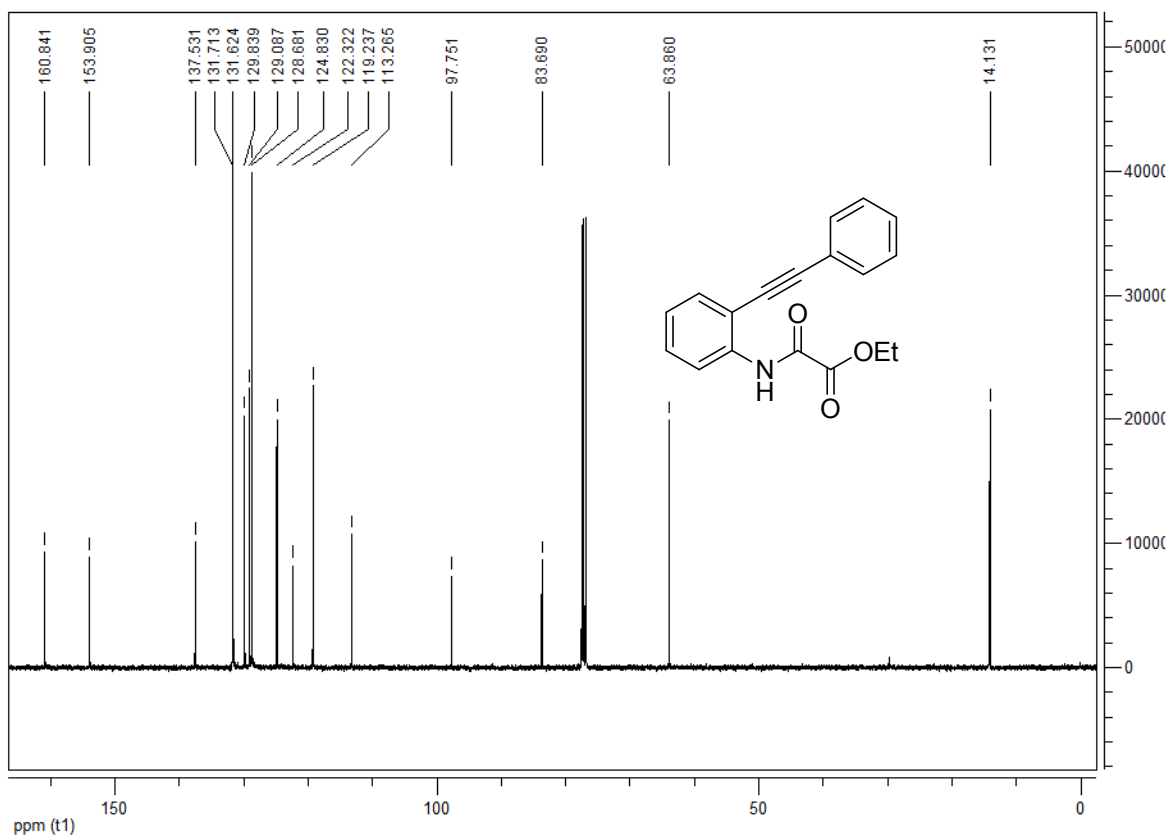

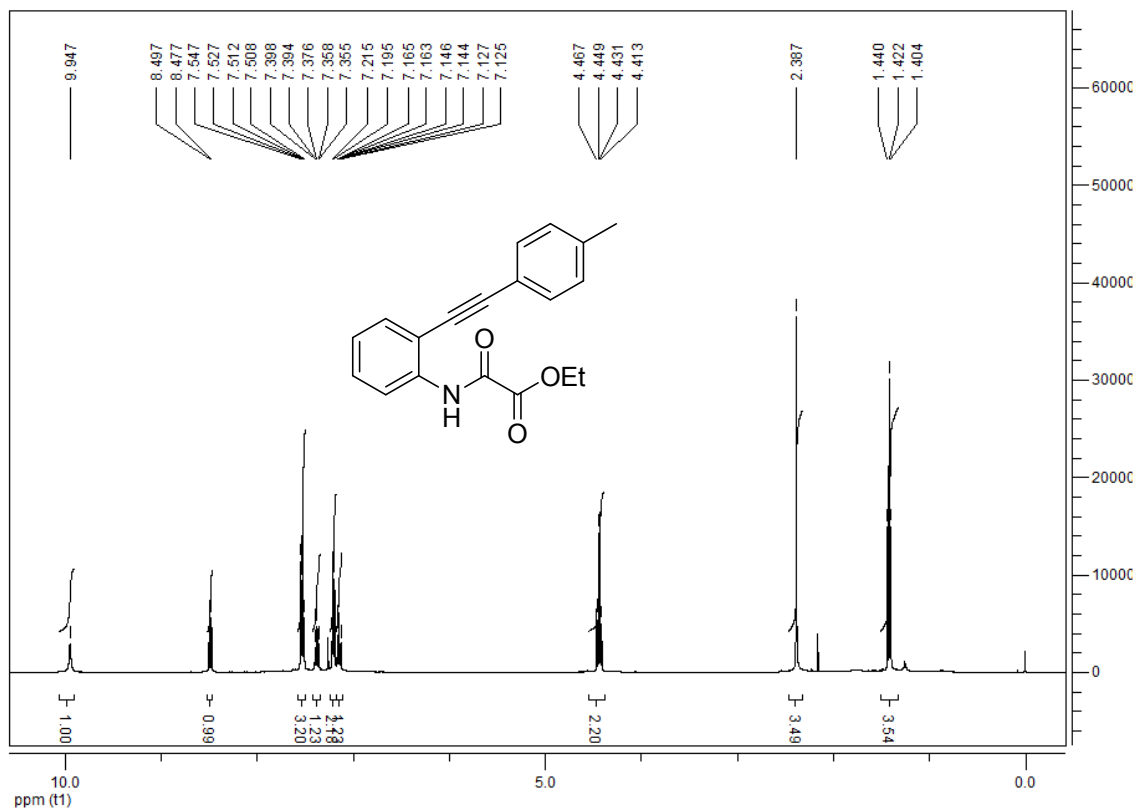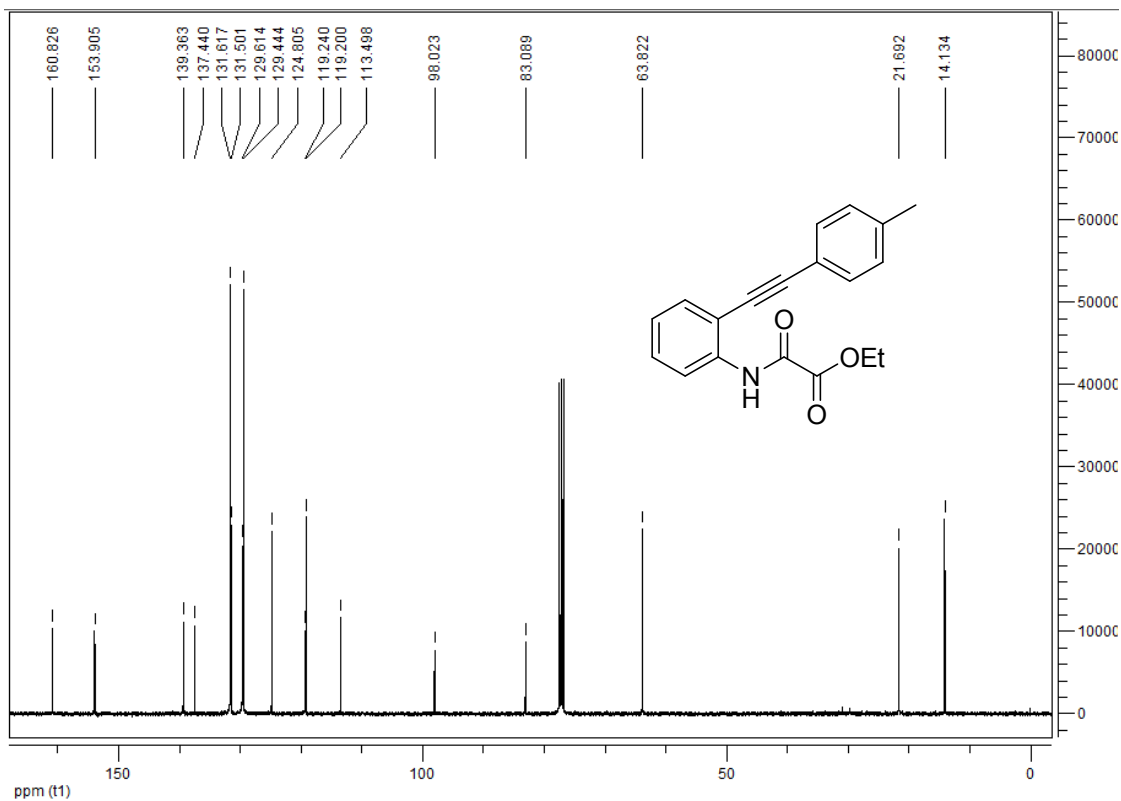

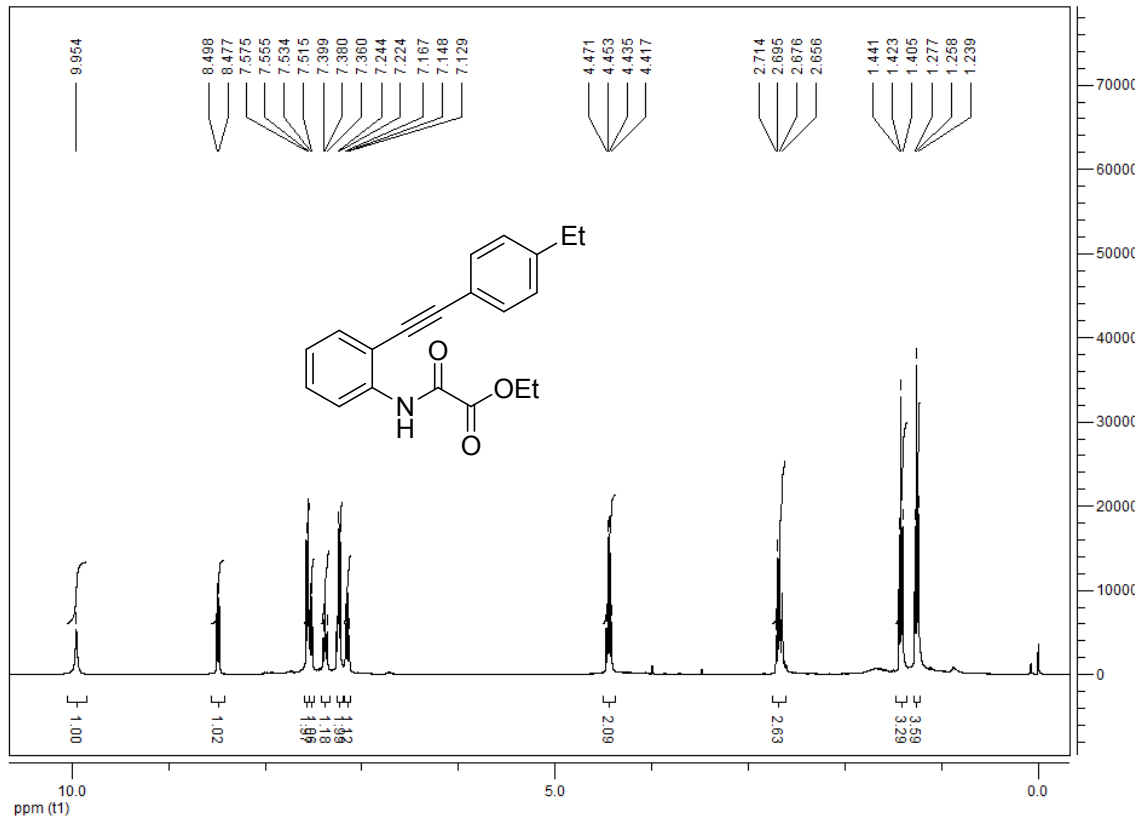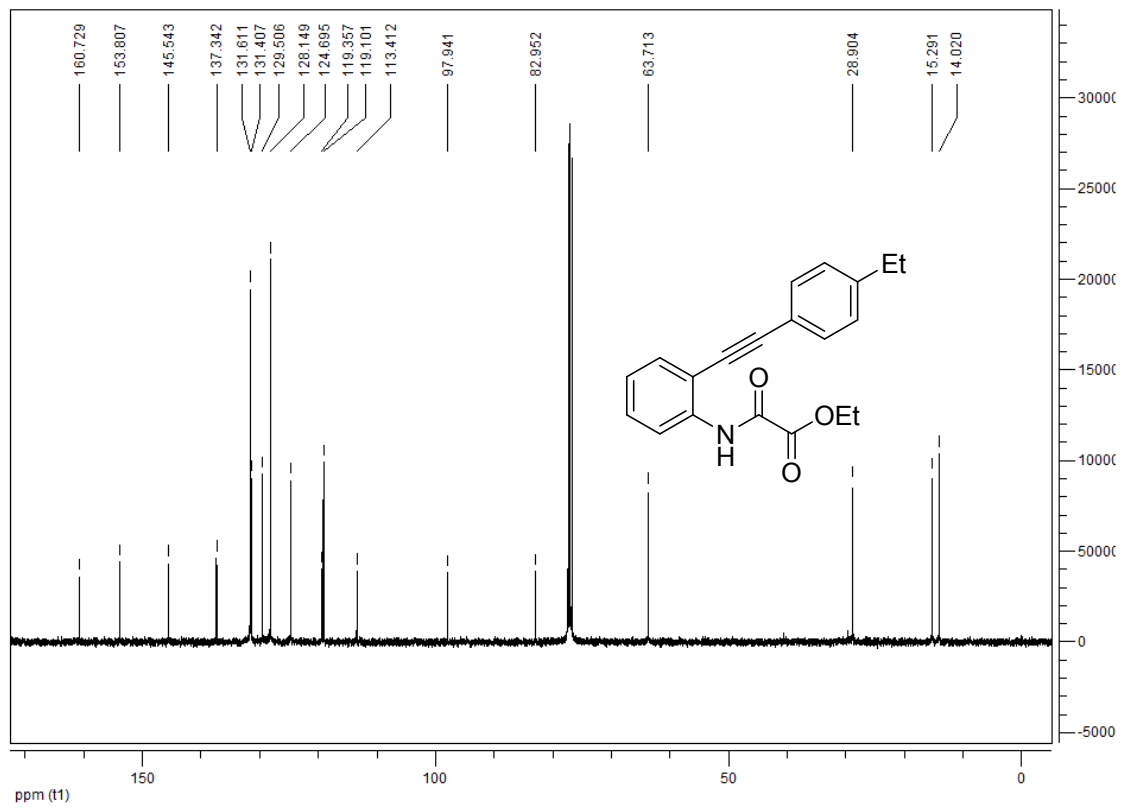

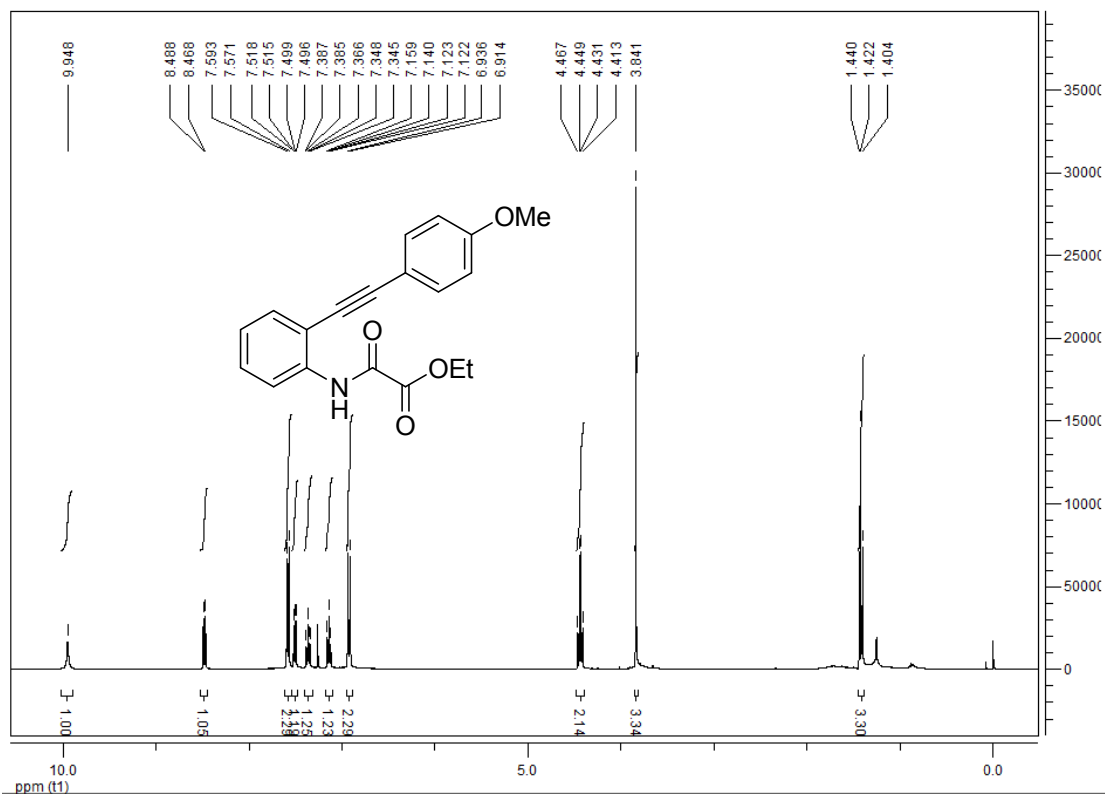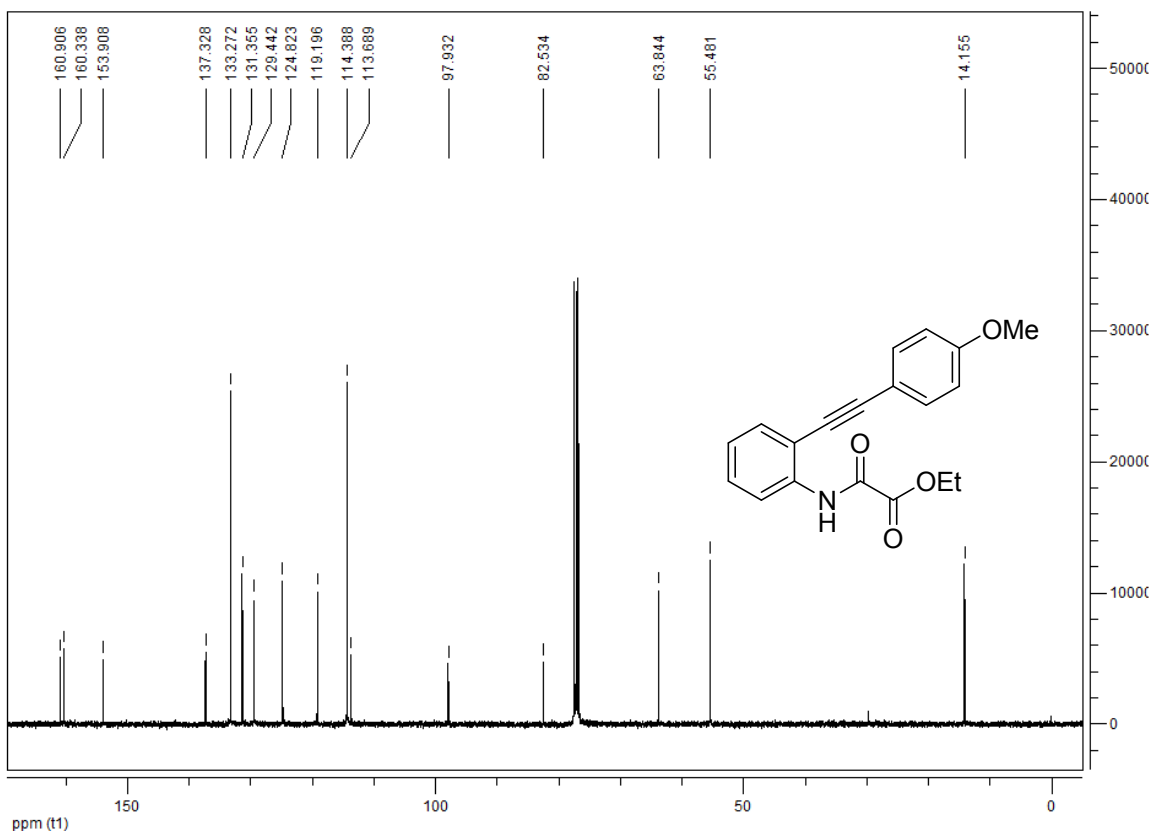



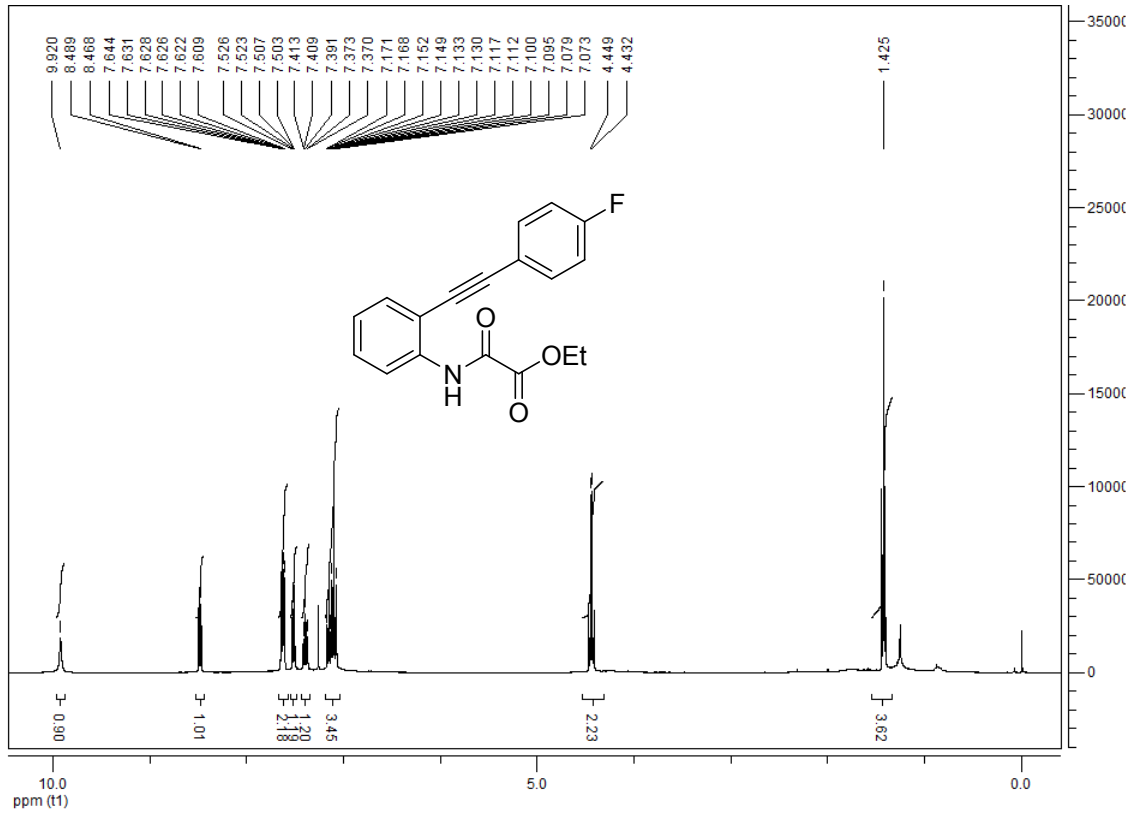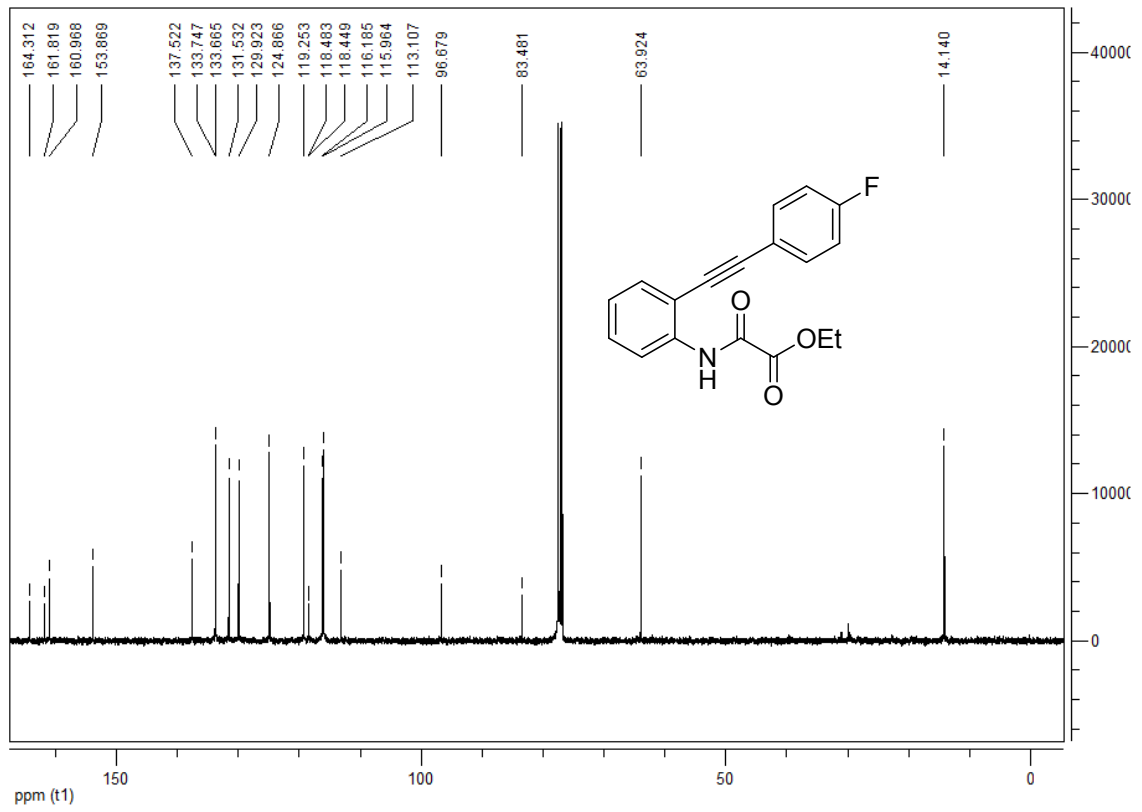



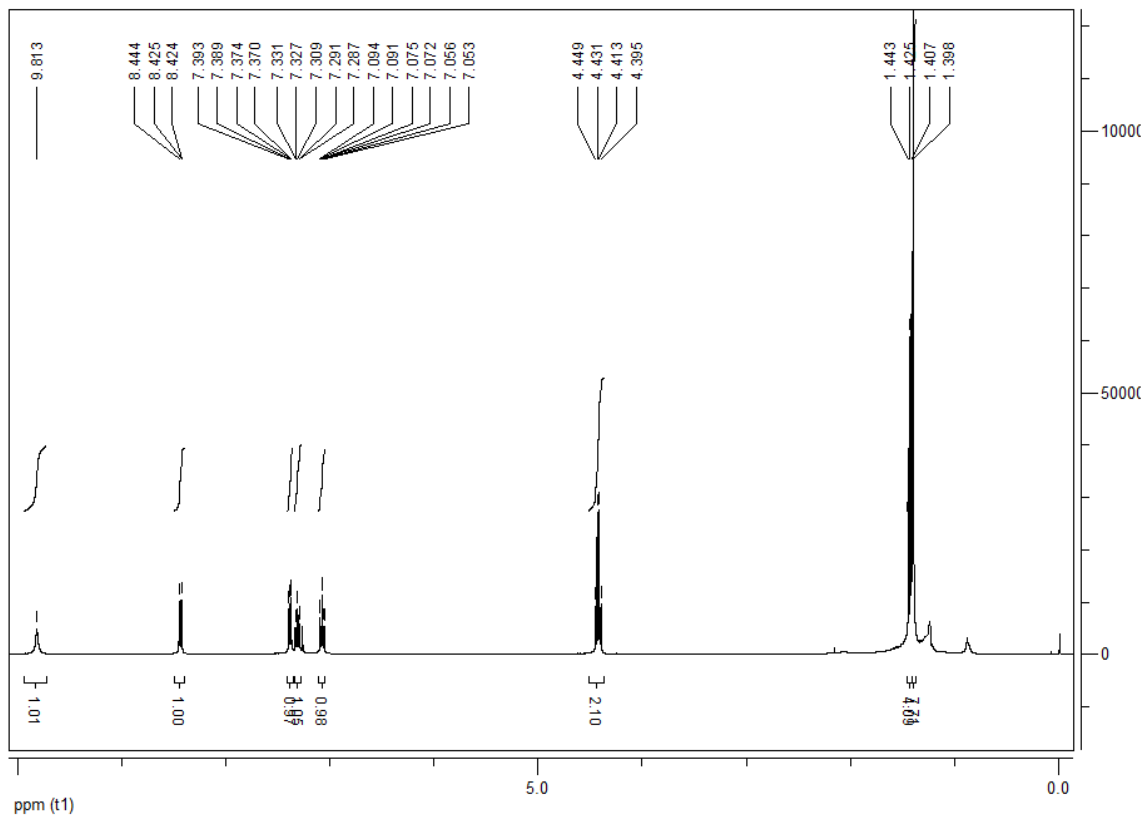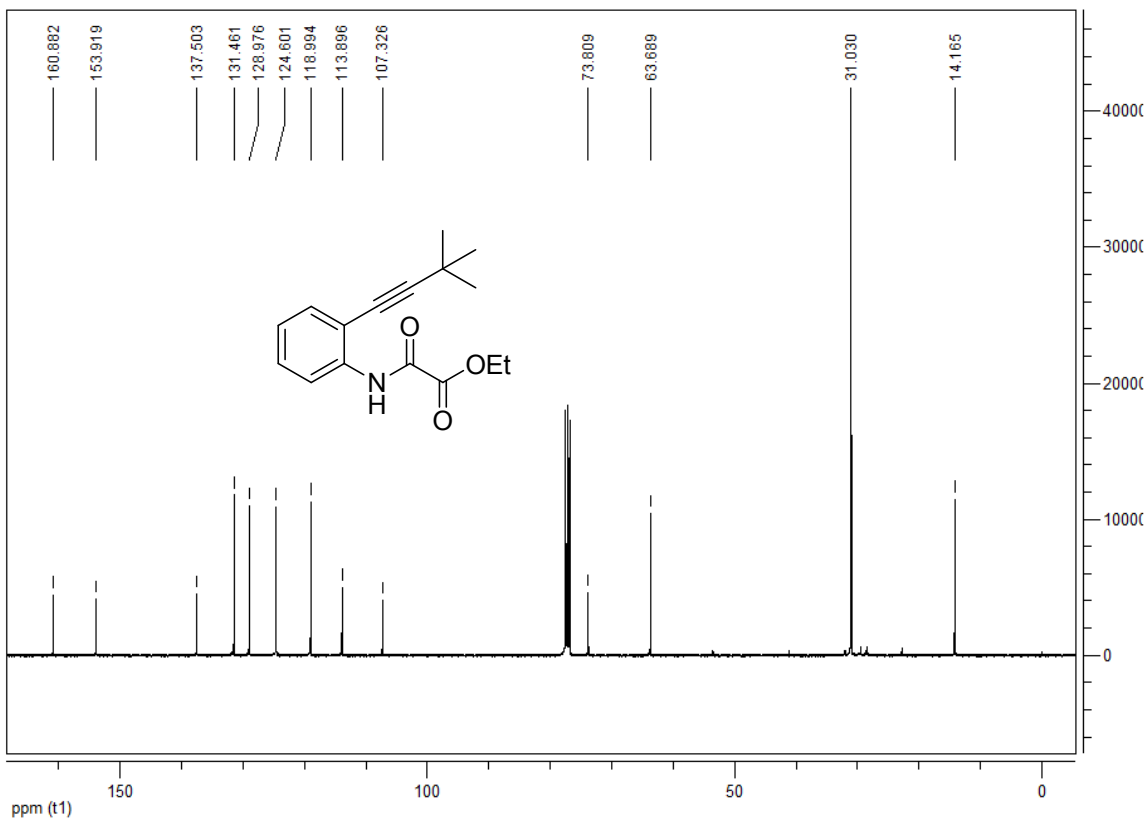

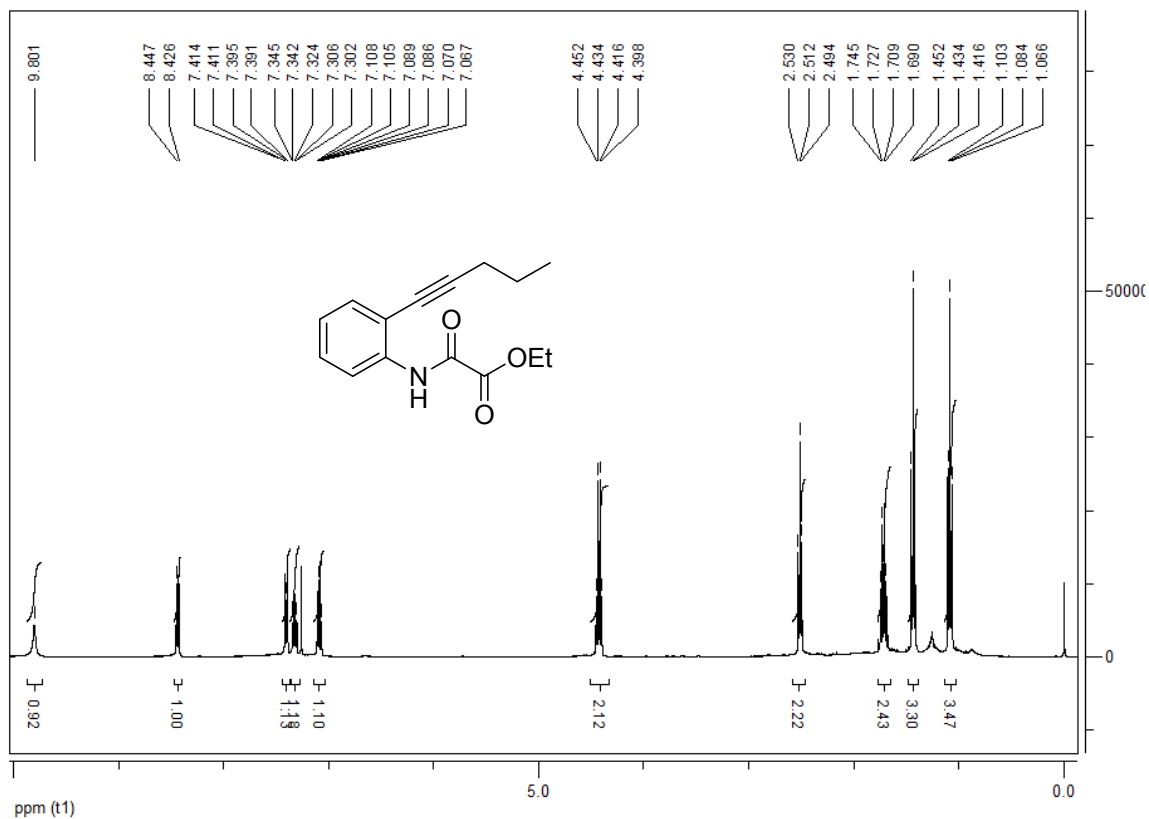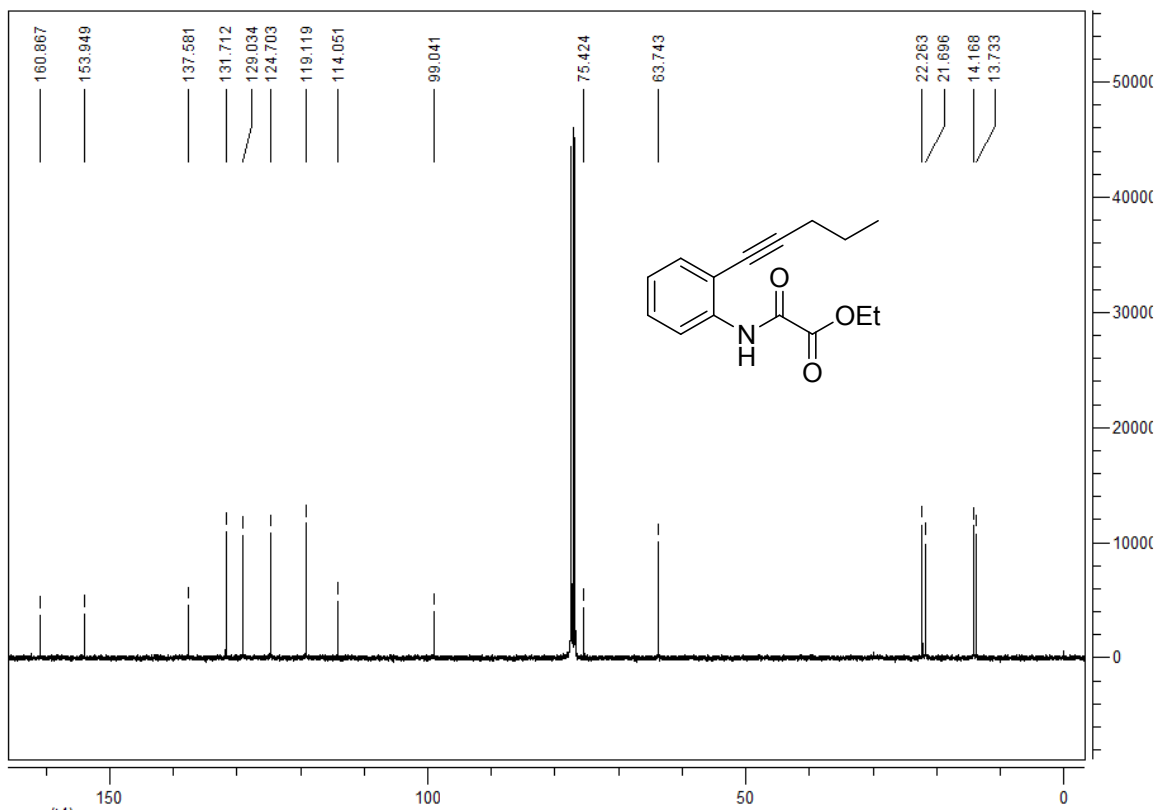

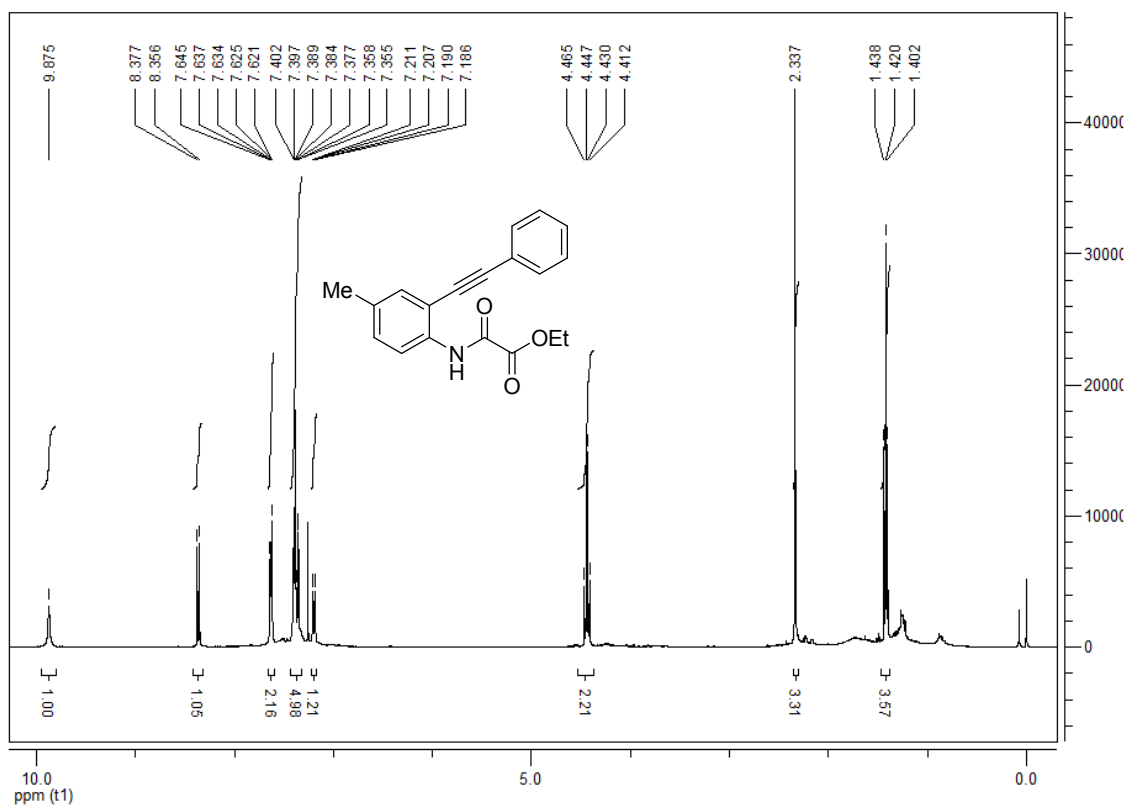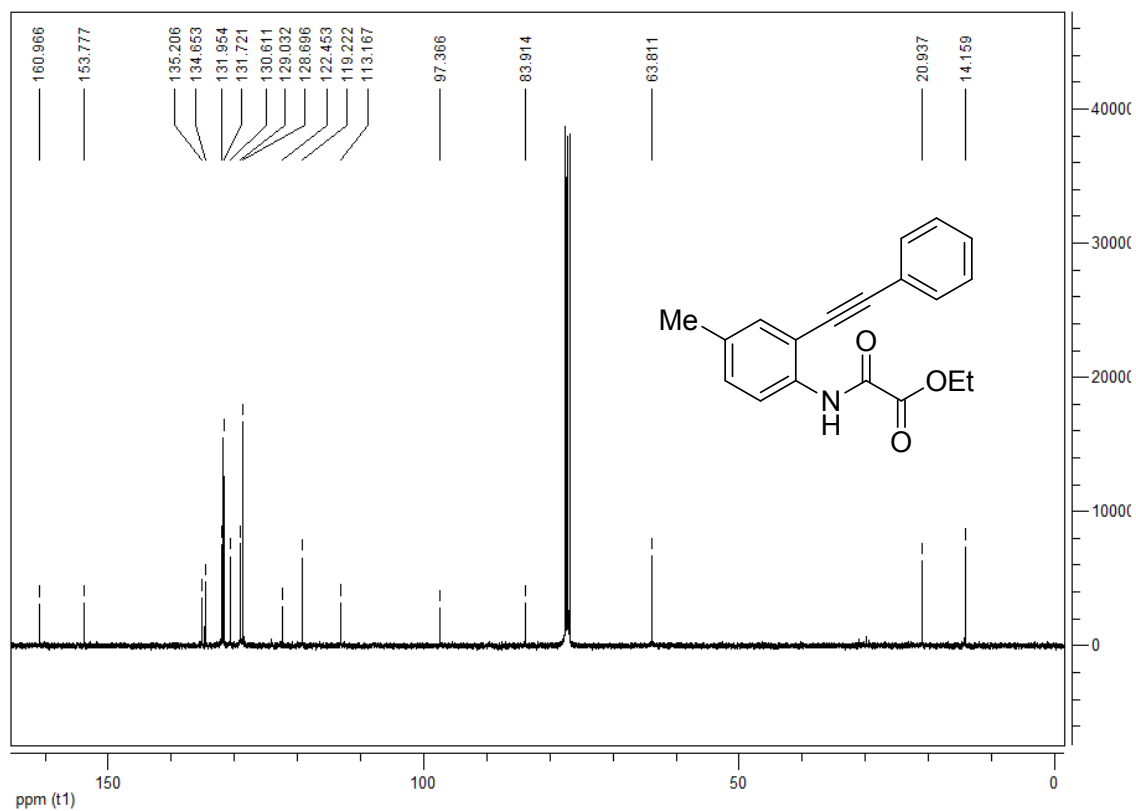



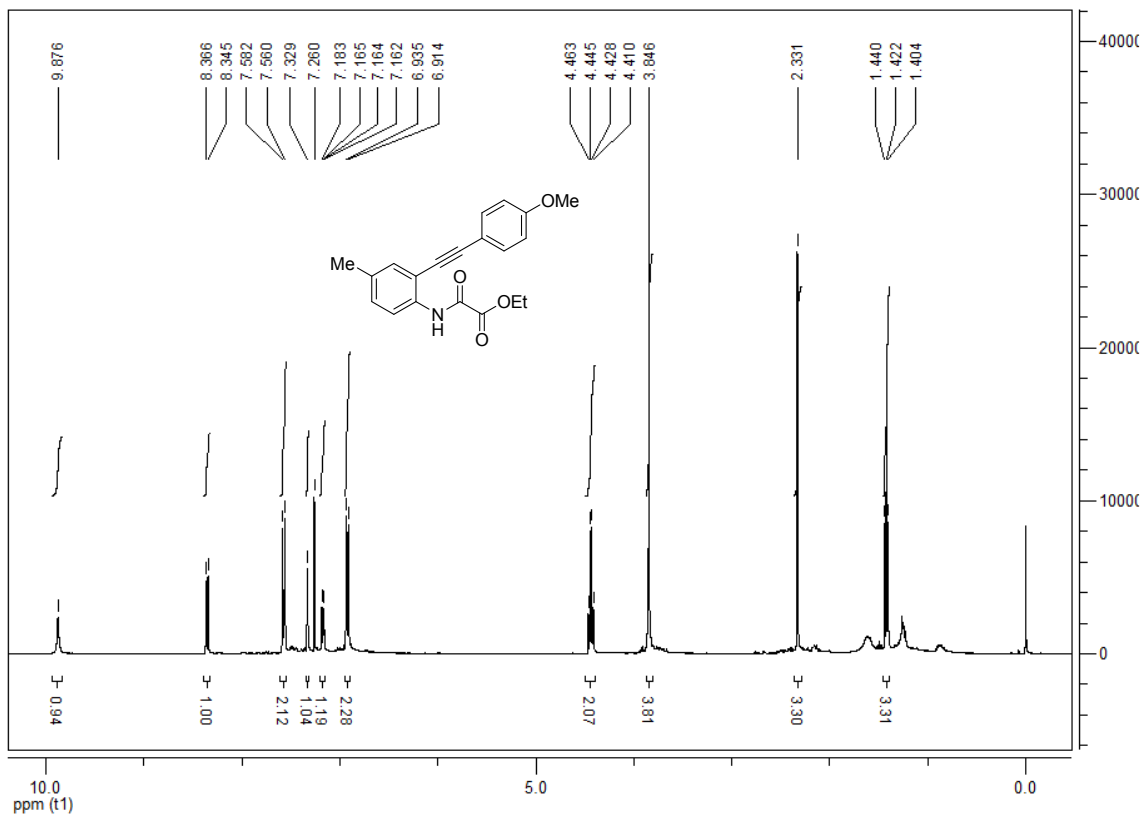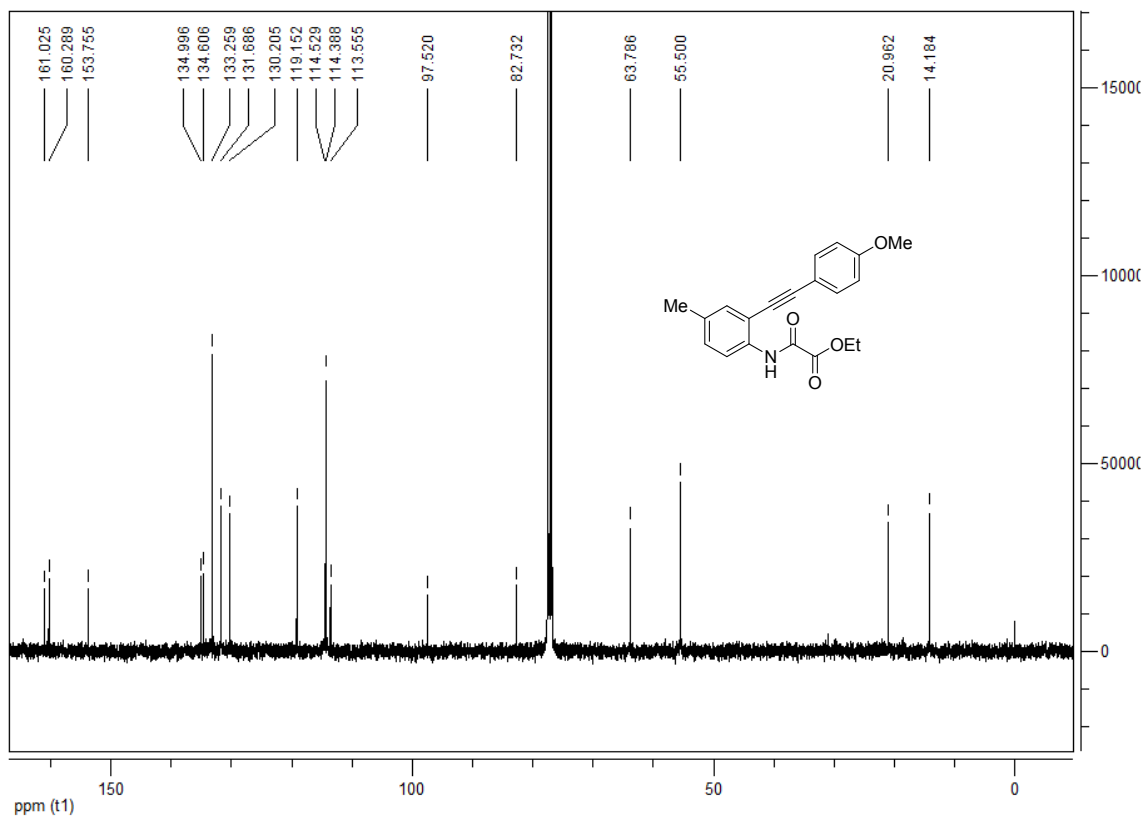

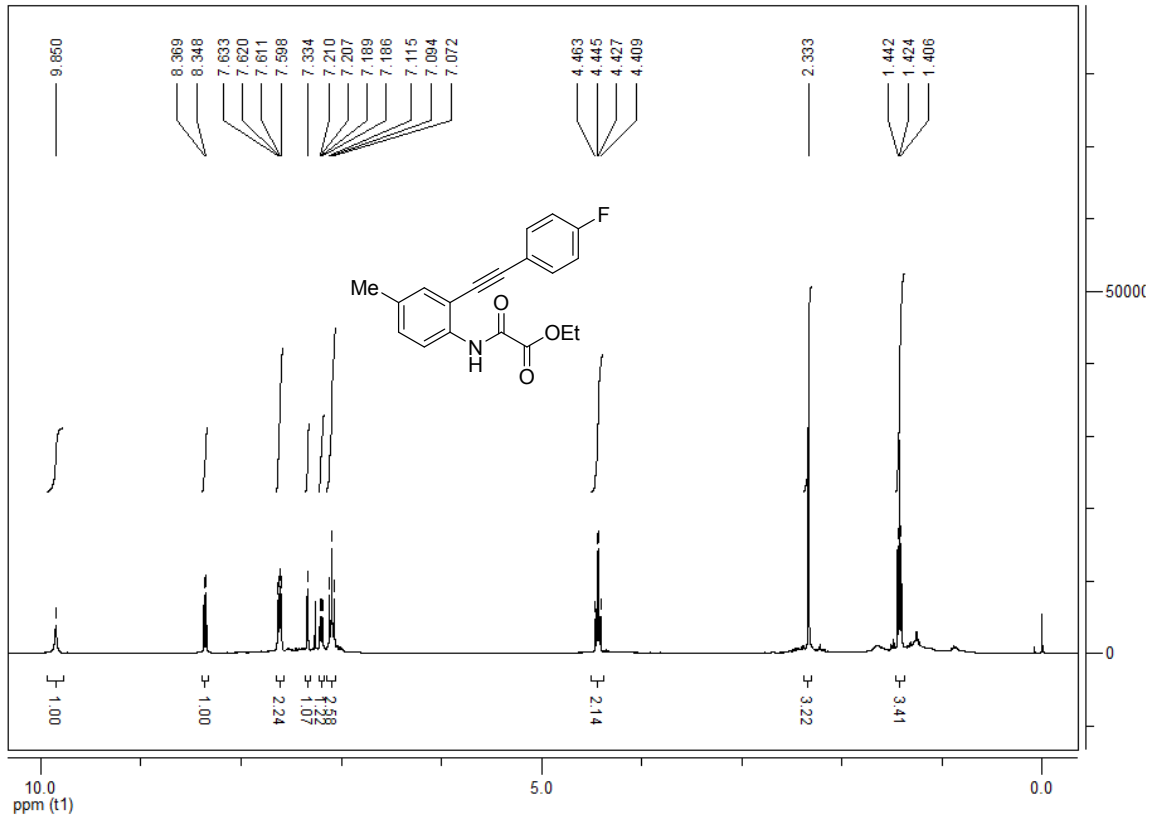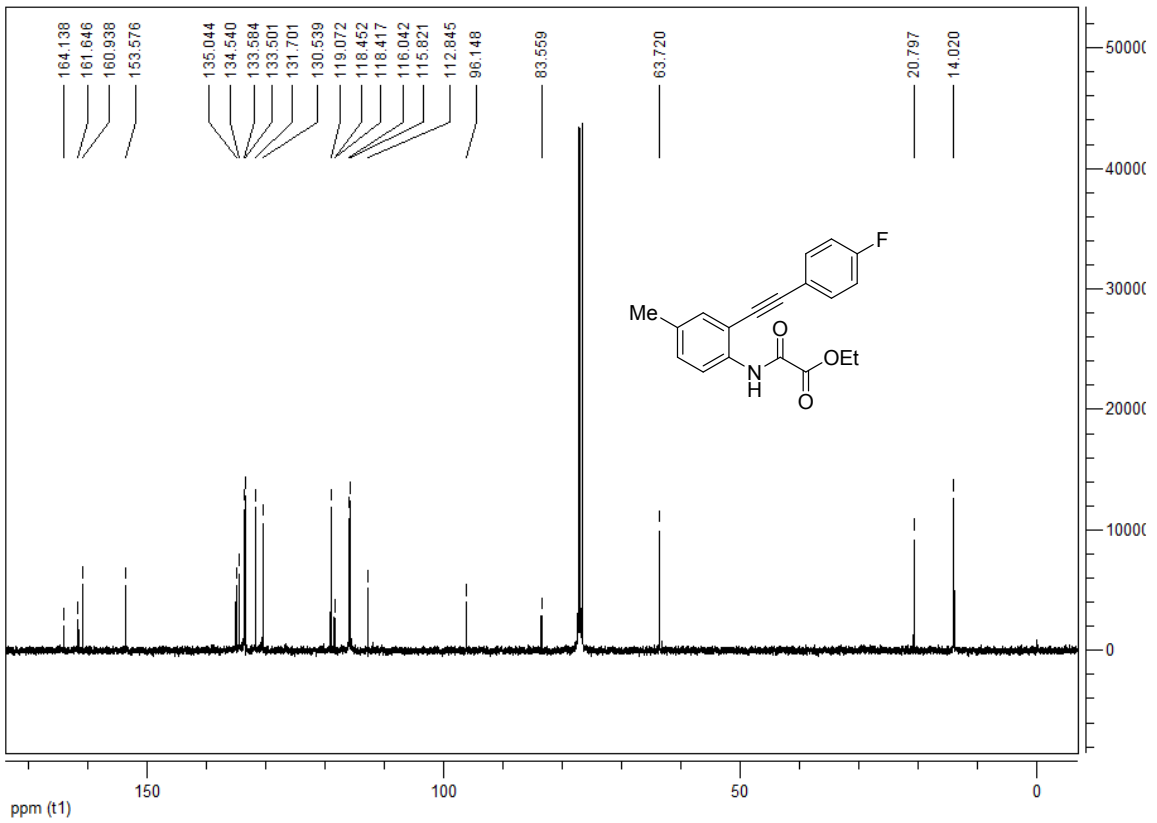



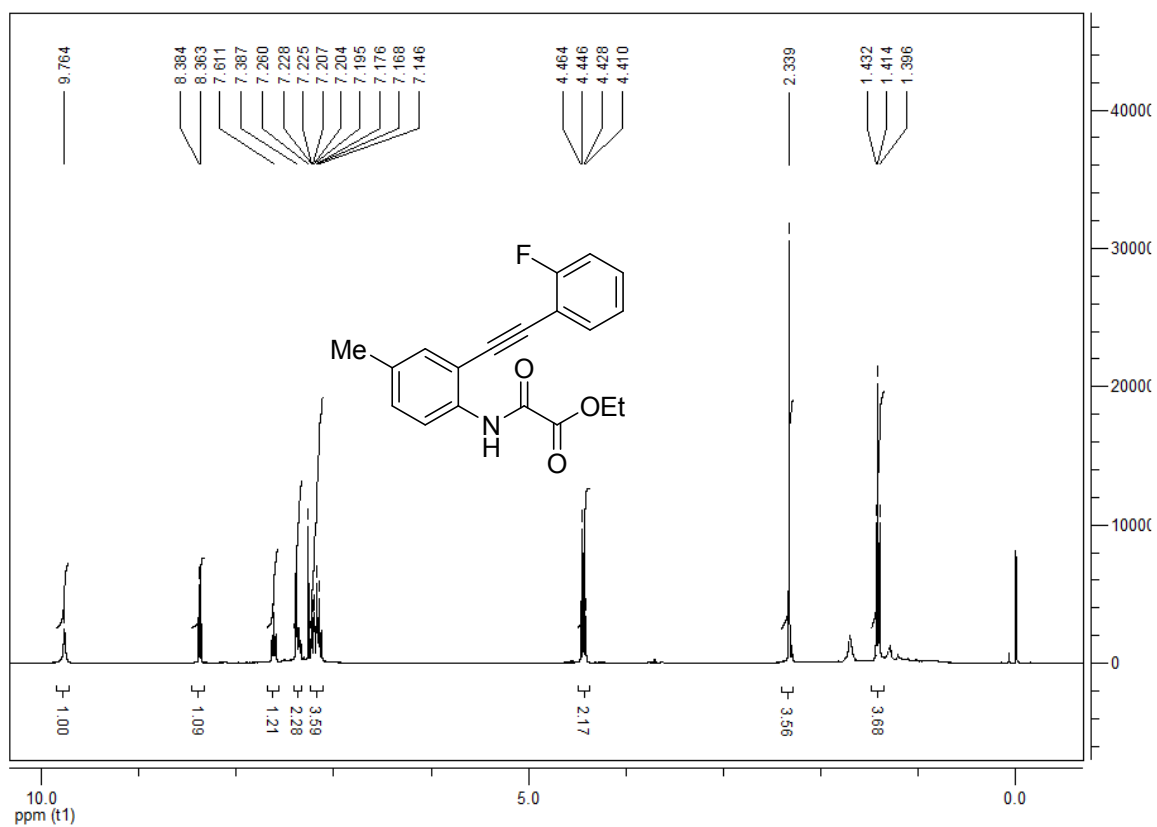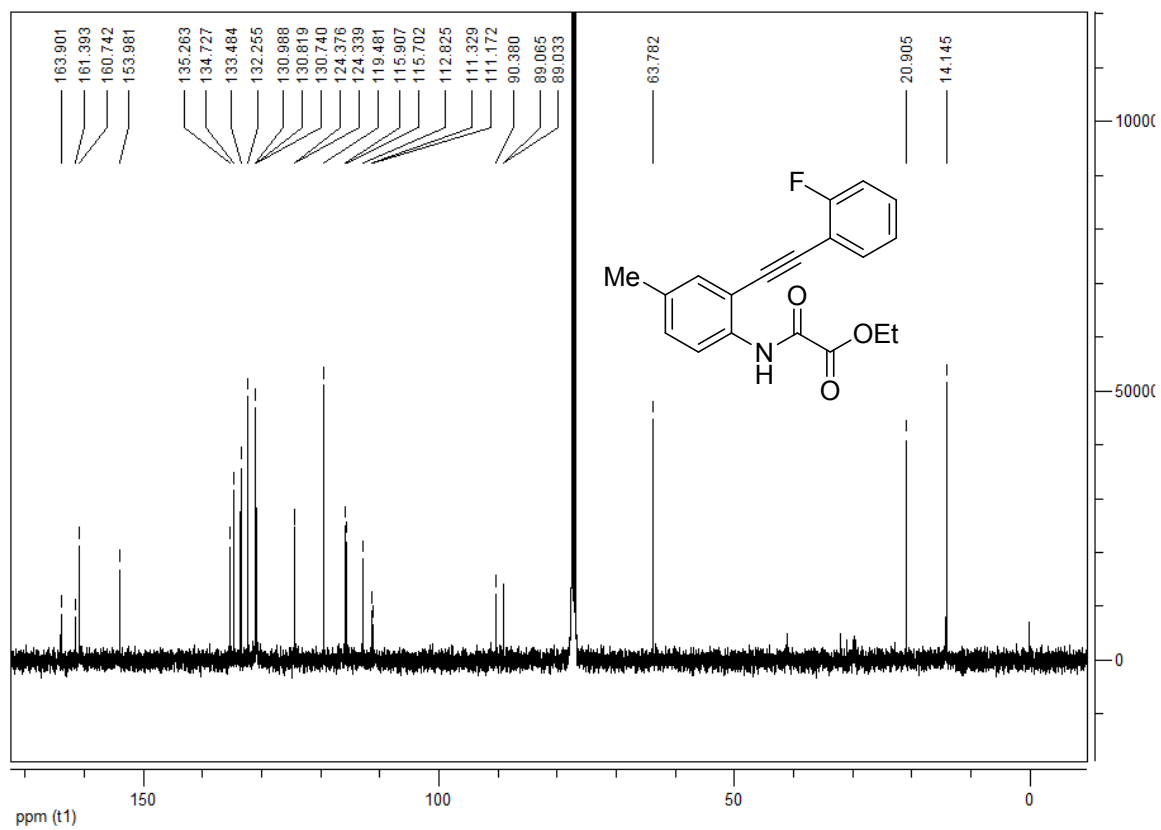

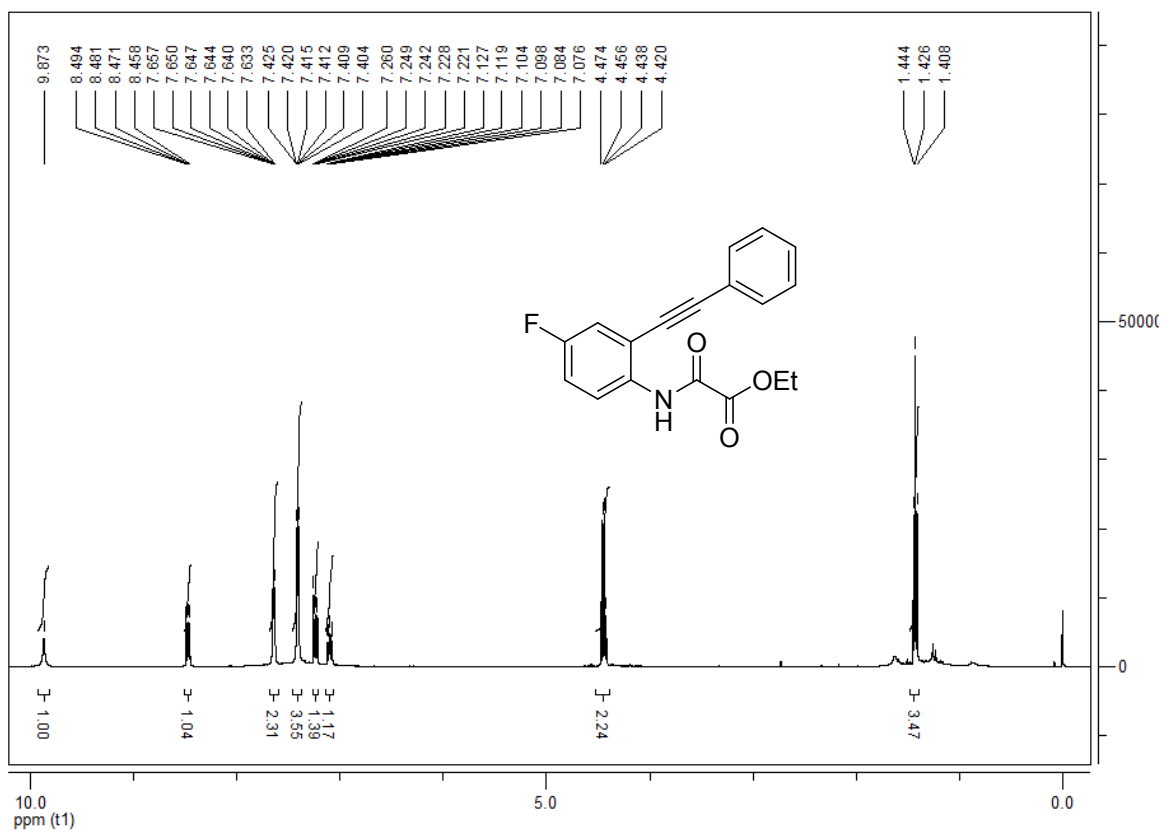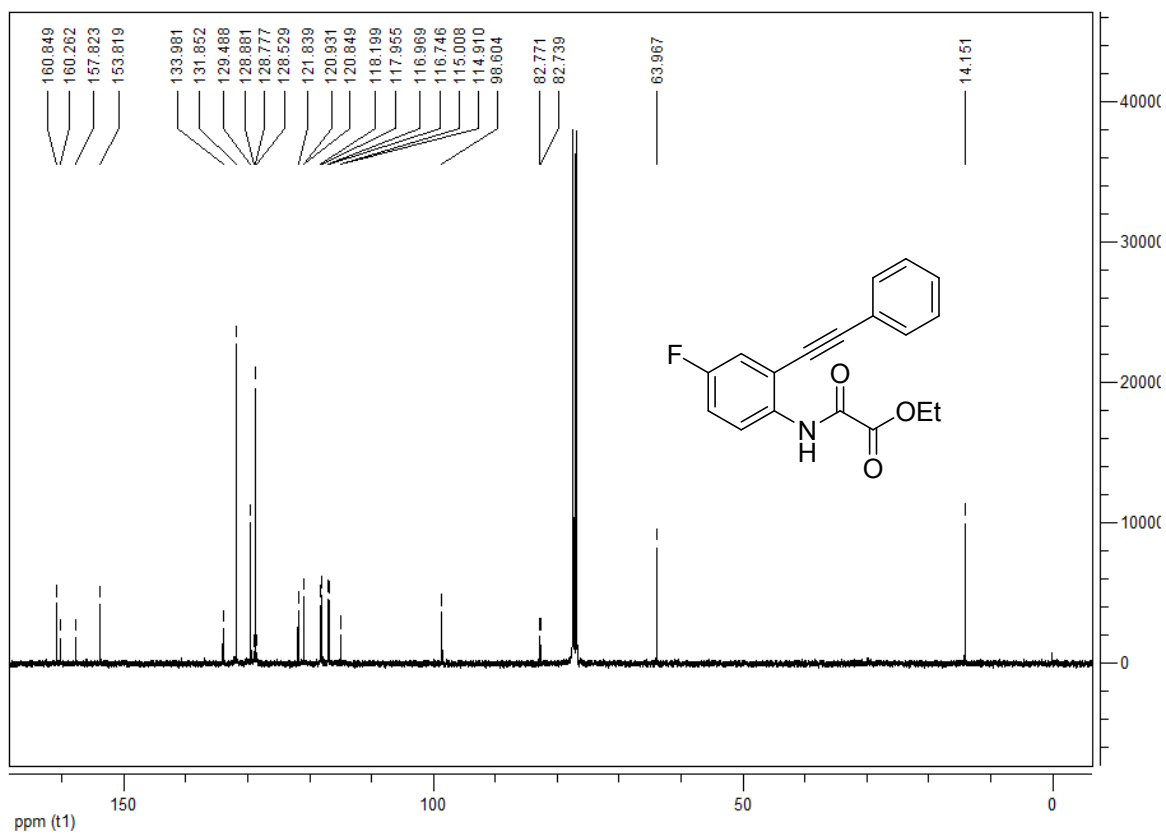

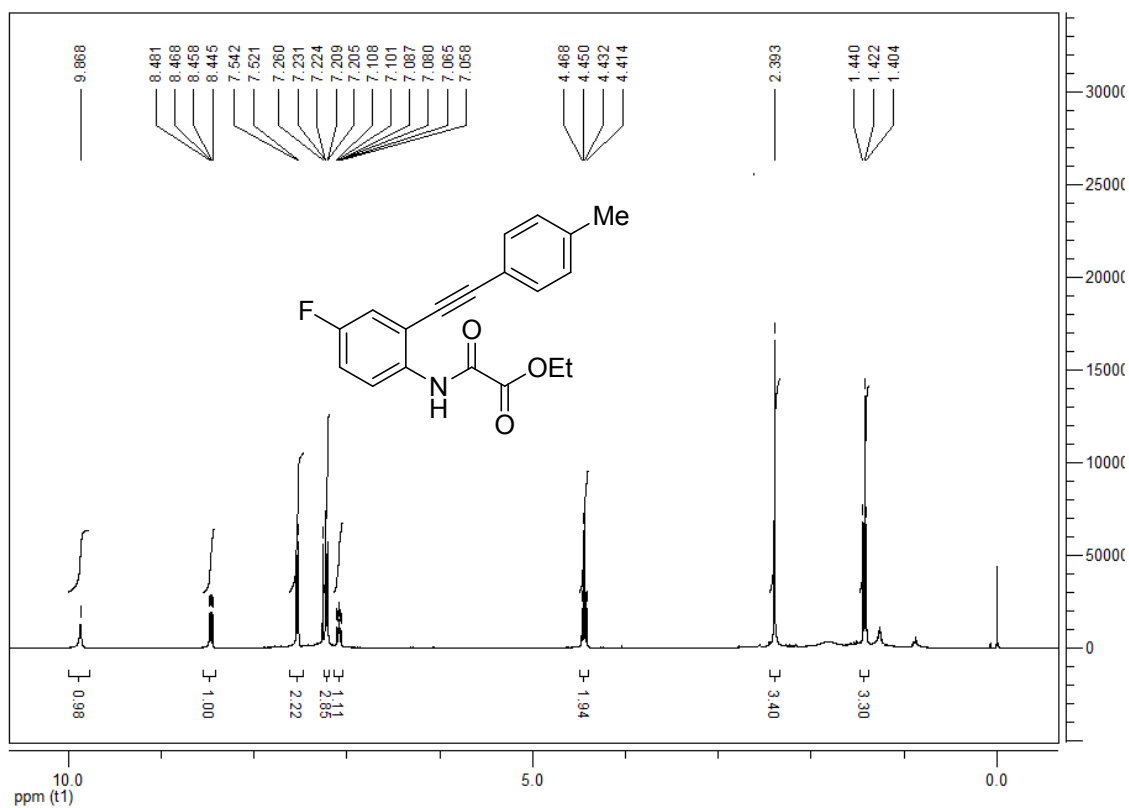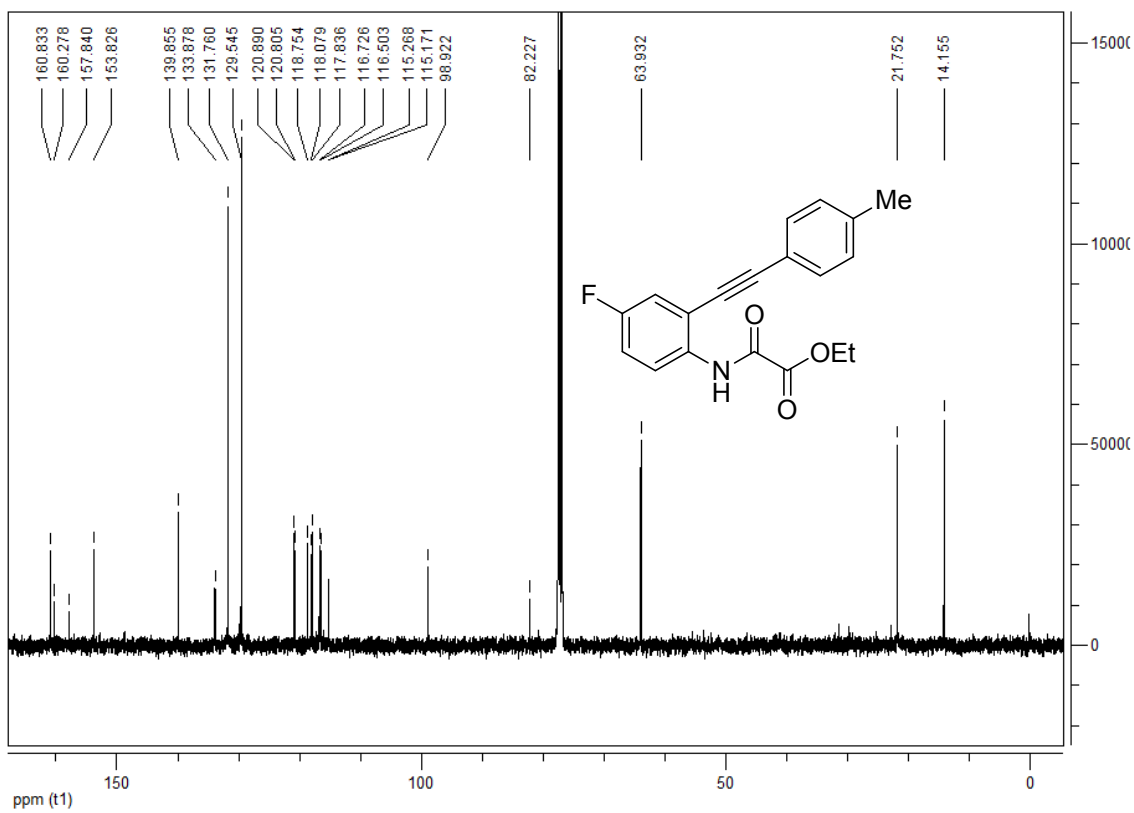

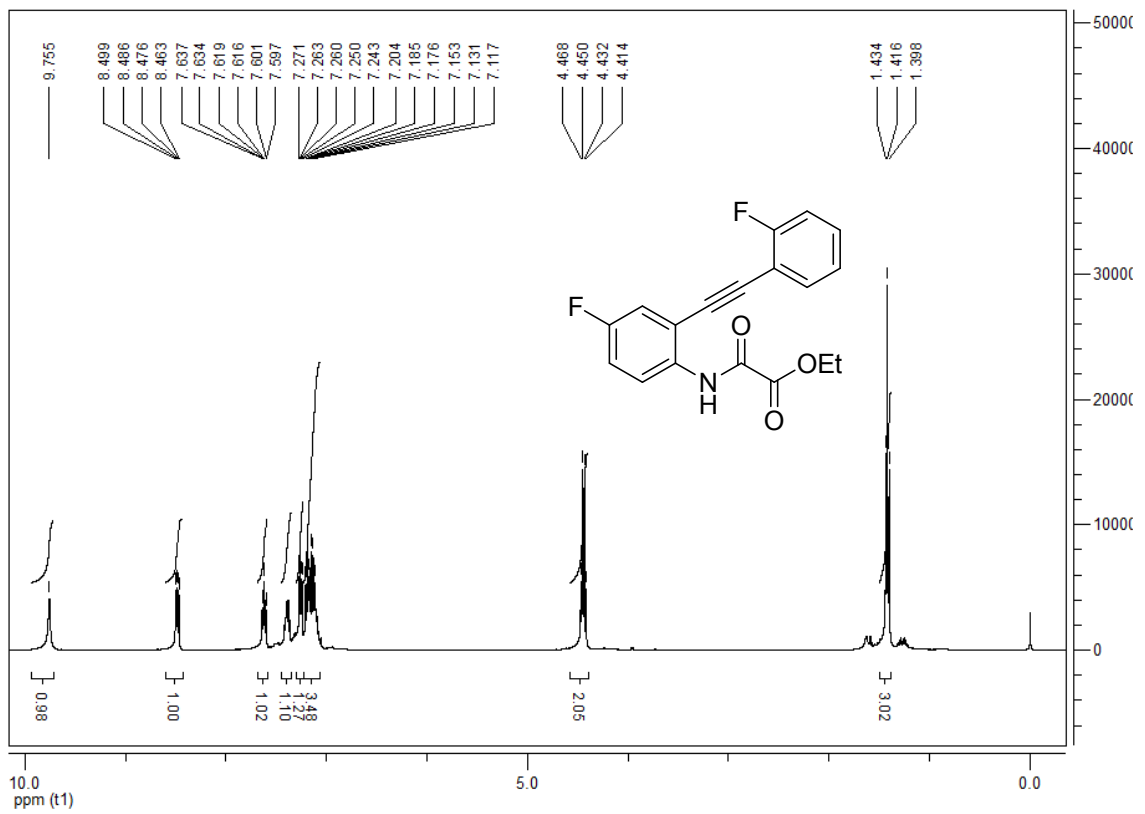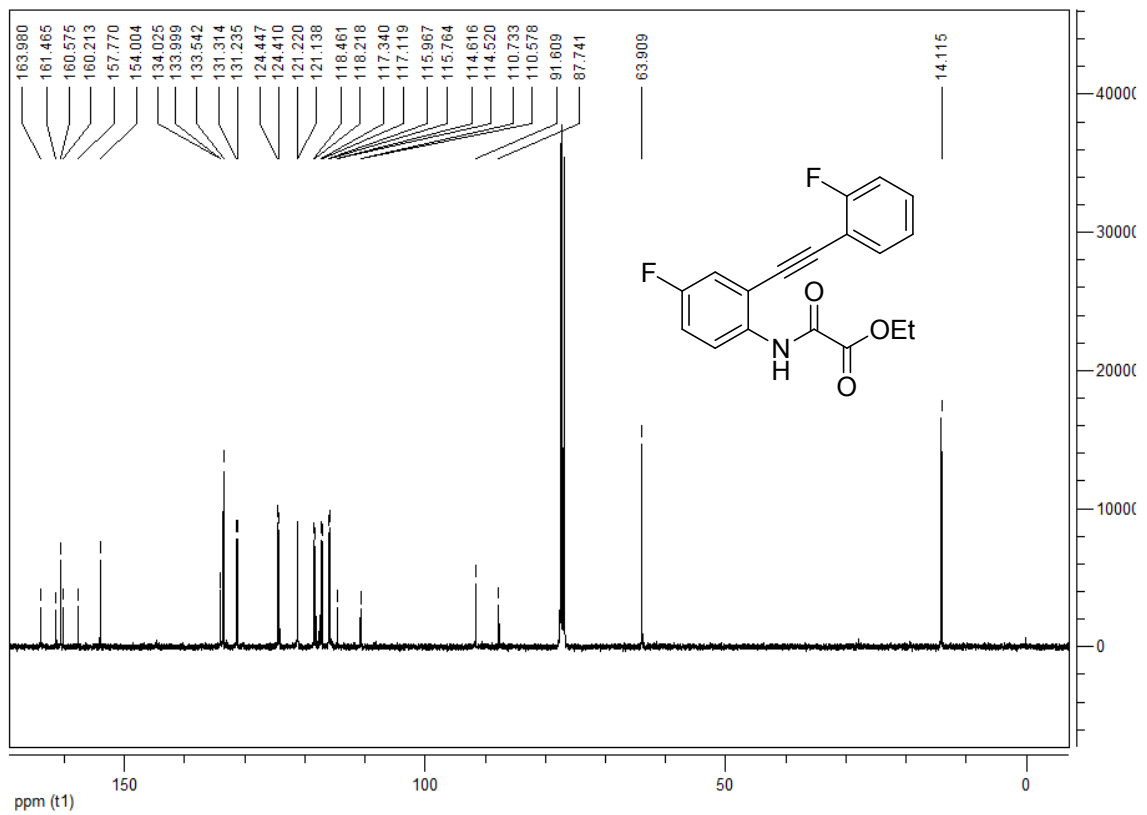

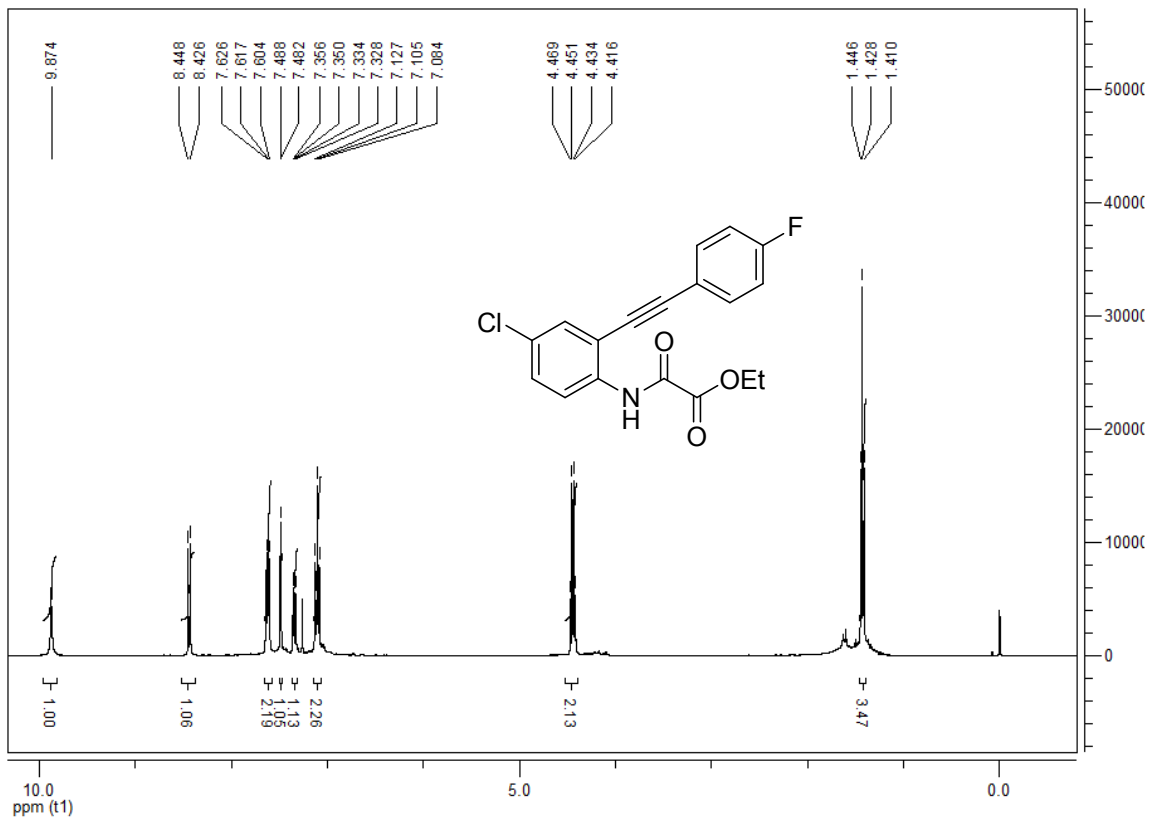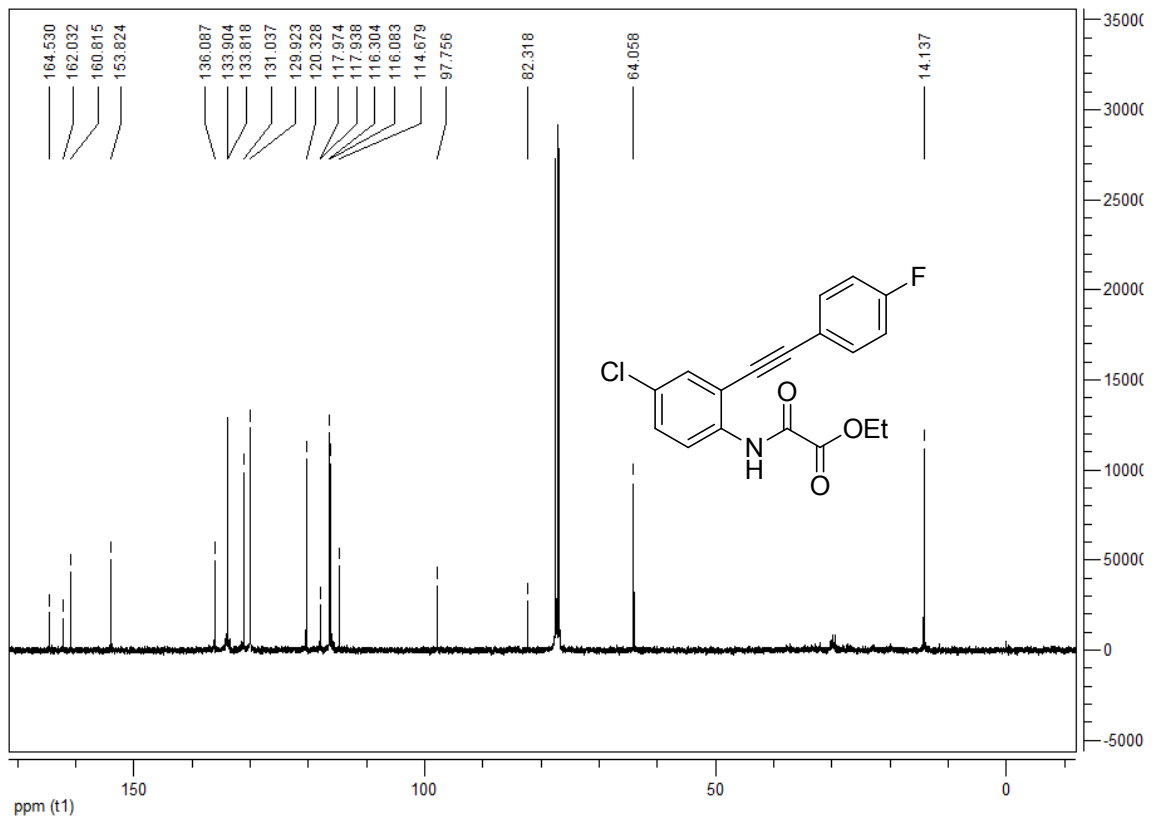

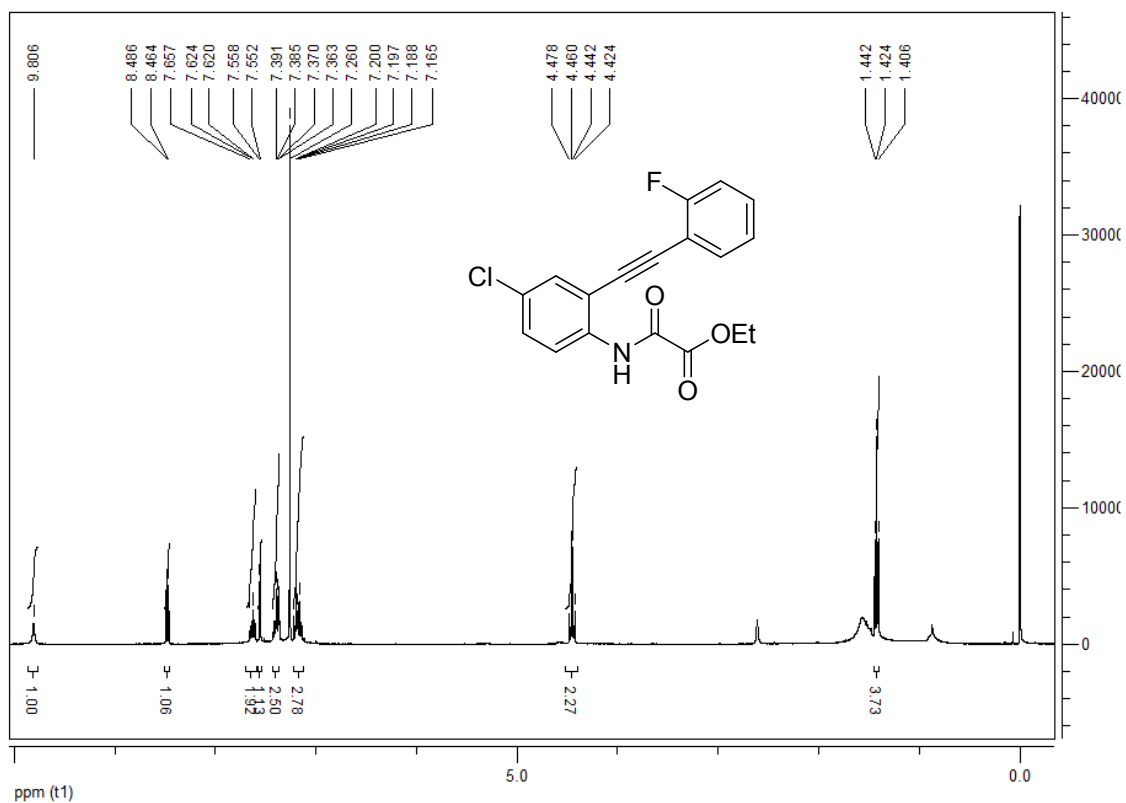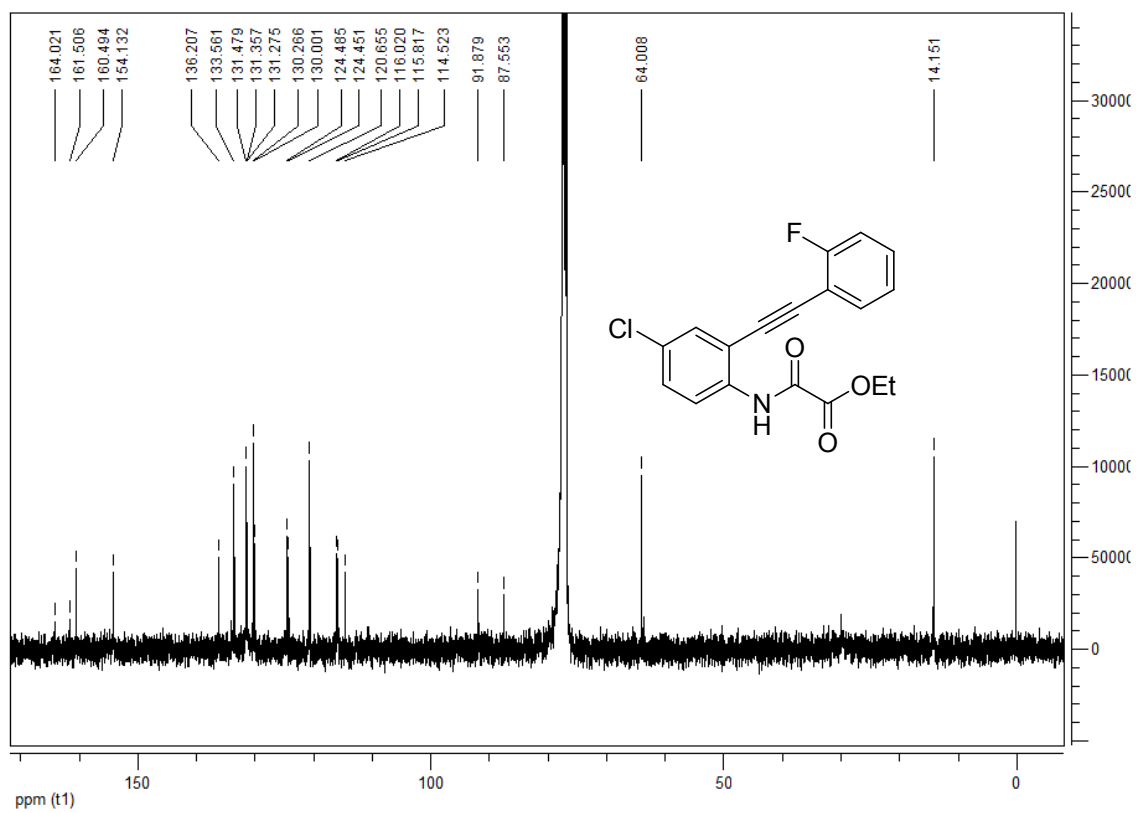

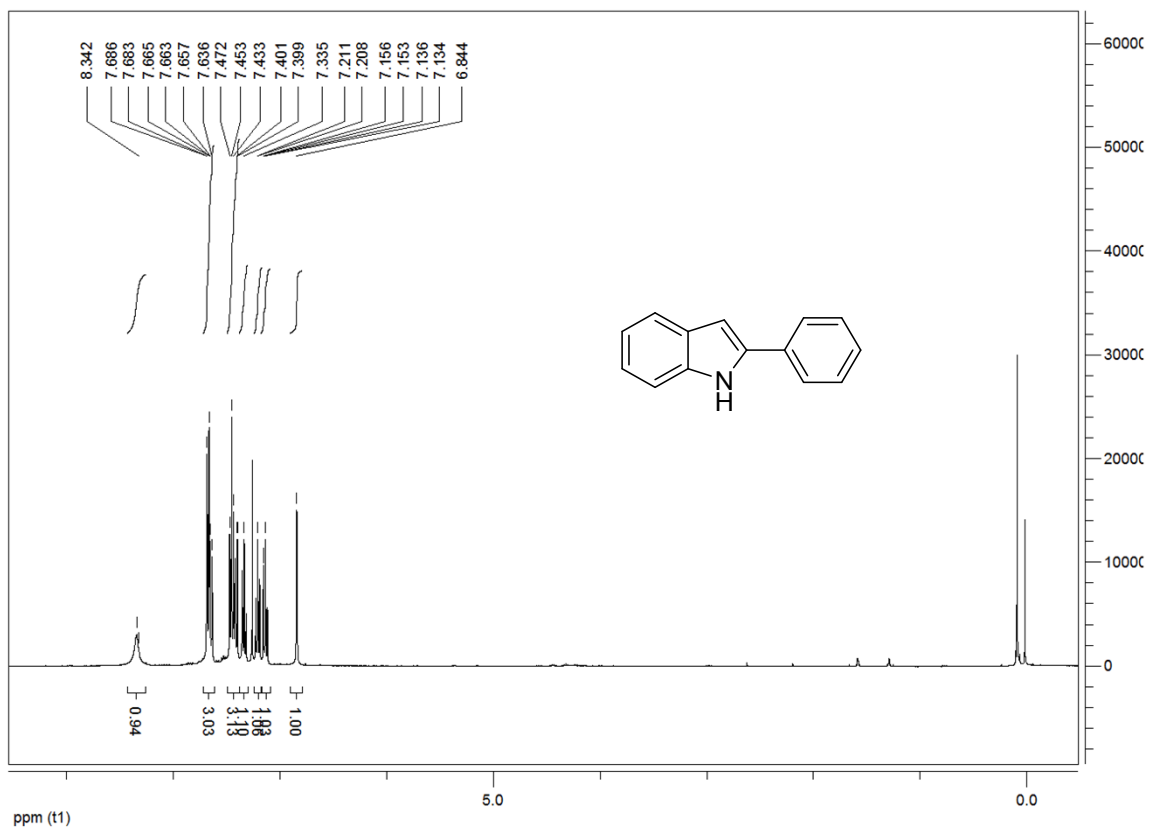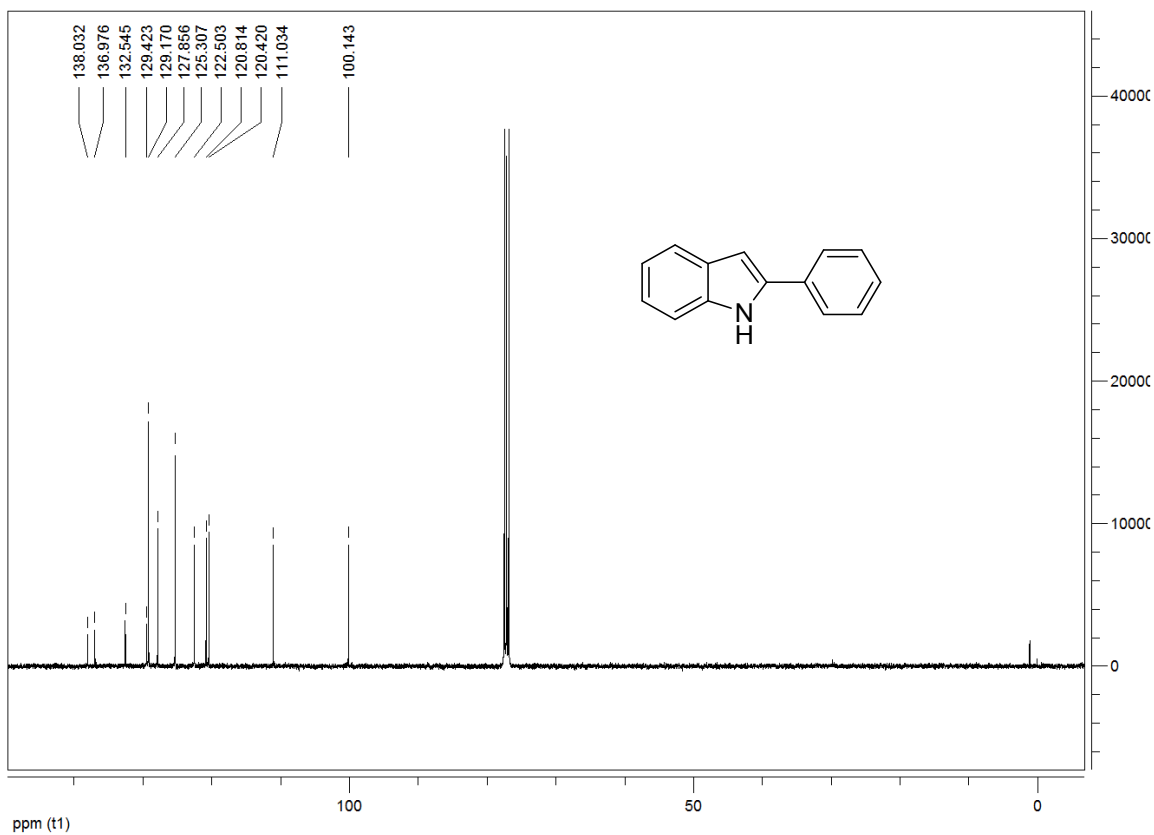

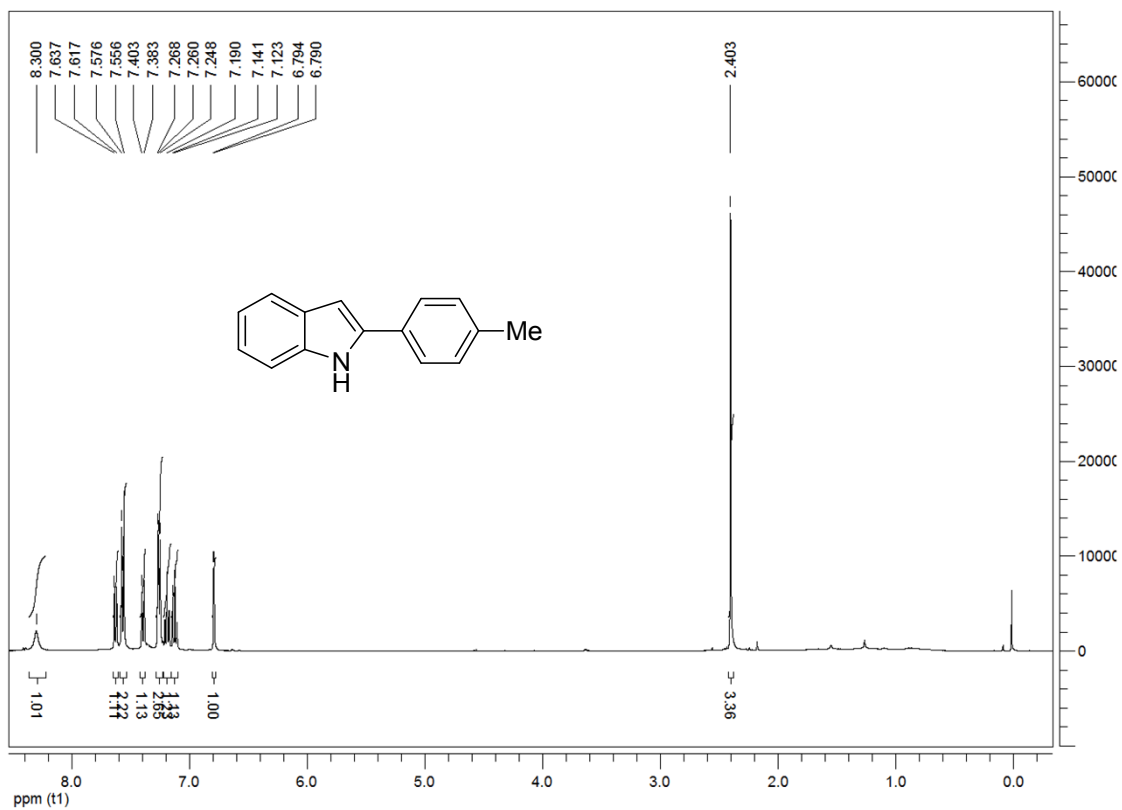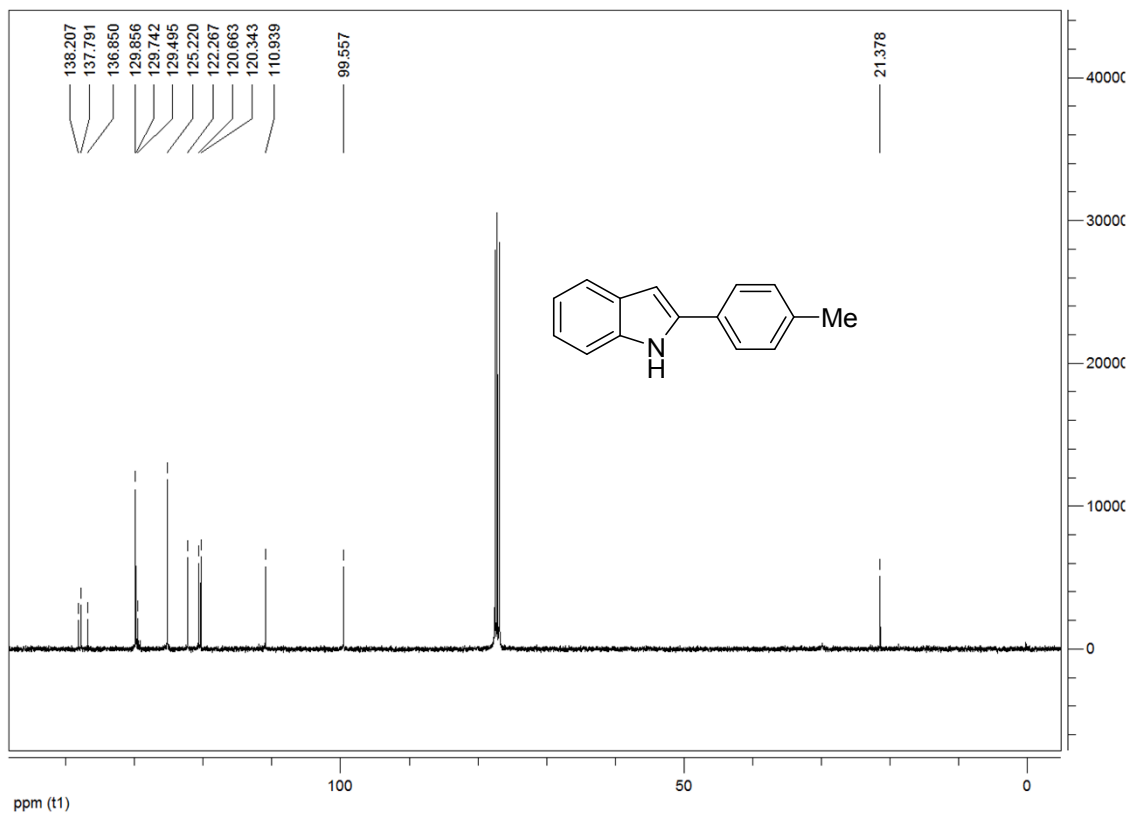



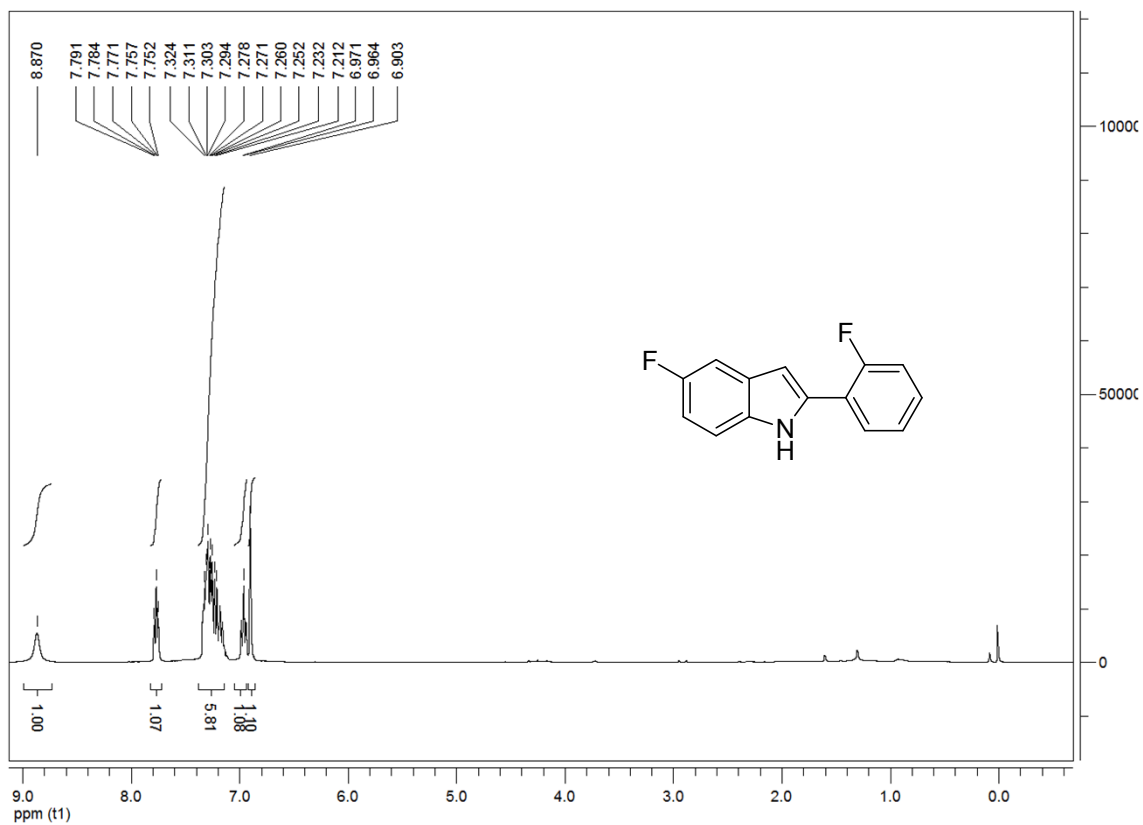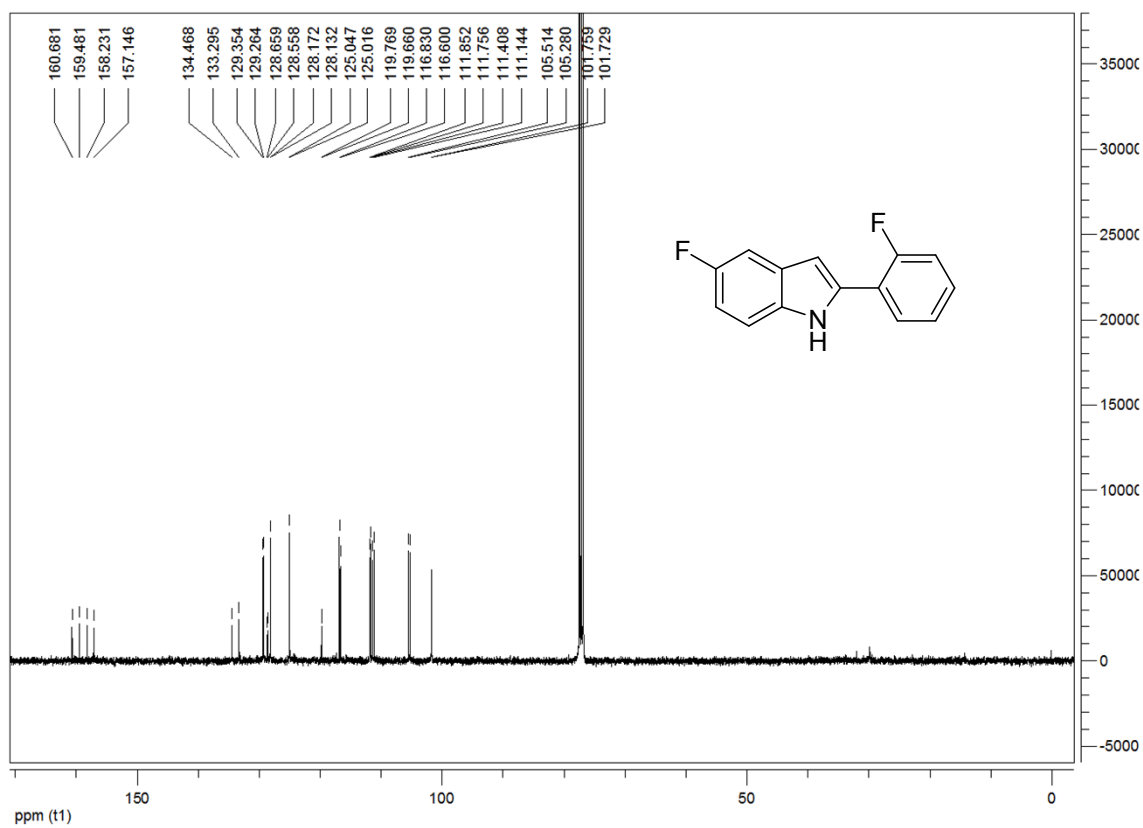

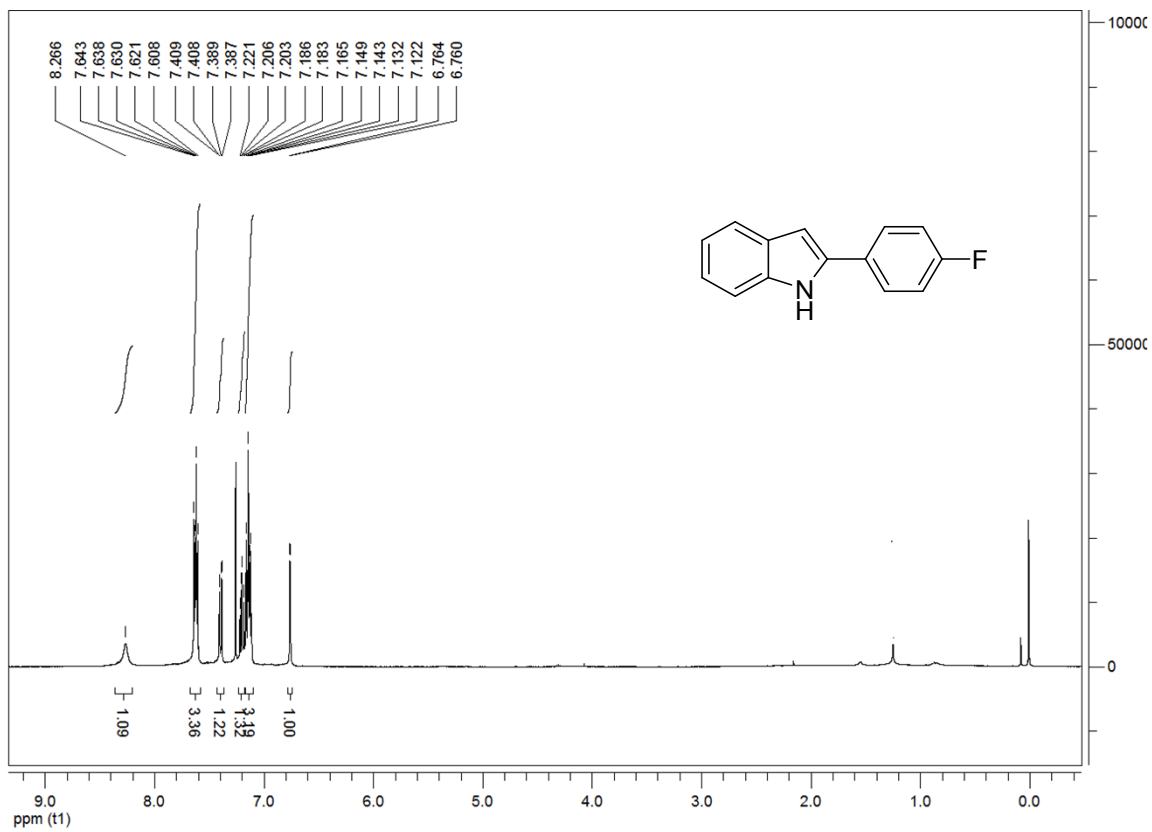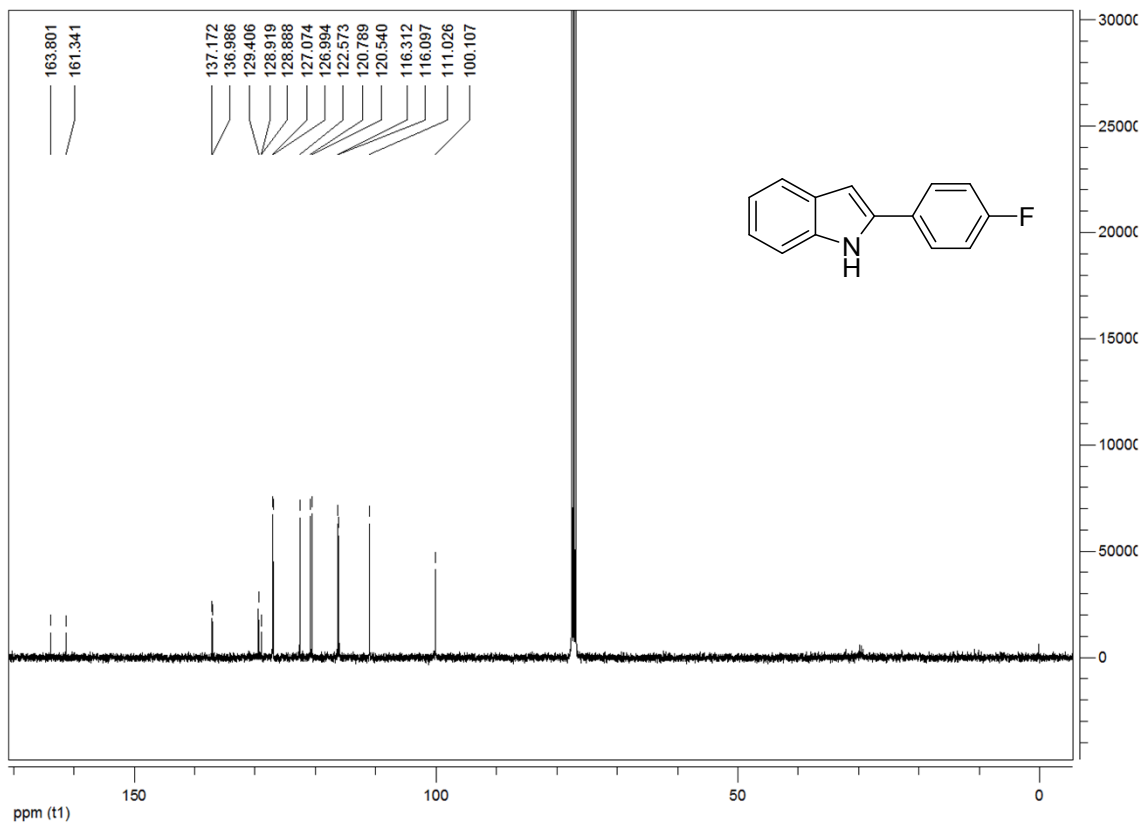

Supplement: c4ra17232a1.pdf [file c4ra17232a1.pdf]
